# Supplementary material for: SARS-CoV-2 Mutant Spectra at Different Depth Levels Reveal an Overwhelming Abundance of Low Frequency Mutations
Source: MDPI journal article supplement (doi:10.3390/pathogens11060662), 2022-06-08
Supplement: s1 [file s1]

## **Supplementary material for:**

### **SARS-CoV-2 mutant spectra at different depth levels reveal an overwhelming abundance of low frequency mutations**

Brenda Martínez-González<sup>1,2</sup>, María Eugenia Soria<sup>1,3,4</sup>, Lucía Vázquez-Sirvent<sup>1</sup>, Cristina Ferrer-Orta<sup>5</sup>, Rebeca Lobo-Vega<sup>1</sup>, Pablo Mínguez<sup>6,7,8</sup>, Lorena de la Fuente<sup>6,7,8</sup>, Carlos Llorens<sup>9</sup>, Beatriz Soriano<sup>9</sup>, Ricardo Ramos-Ruíz<sup>10</sup>, Marta Cortón<sup>6,7</sup>, Rosario López-Rodríguez<sup>6,7</sup>, Carlos García-Crespo<sup>3,4</sup>, Pilar Somovilla<sup>3,11</sup>, Antoni Durán-Pastor<sup>3</sup>, Isabel Gallego<sup>3,4</sup>, Ana Isabel de Ávila<sup>3,4</sup>, Soledad Delgado<sup>12</sup>, Federico Morán<sup>13</sup>, Cecilio López-Galíndez<sup>14</sup>, Jordi Gómez<sup>4,15</sup>, Luis Enjuanes<sup>2</sup>, Llanos Salar-Vidal<sup>1</sup>, Mario Esteban-Muñoz<sup>1</sup>, Jaime Esteban<sup>1</sup>, Ricardo Fernandez-Roblas<sup>1</sup>, Ignacio Gadea<sup>1</sup>, Carmen Ayuso<sup>6,7</sup>, Javier Ruíz-Hornillos<sup>16,17,18</sup>, Nuria Verdaguer<sup>5</sup>, Esteban Domingo<sup>3,4\*</sup> and Celia Perales<sup>1,2,4\*</sup>

<sup>1</sup>Department of Clinical Microbiology, Instituto de Investigación Sanitaria-Fundación Jiménez Díaz University Hospital, Universidad Autónoma de Madrid (IIS-FJD, UAM) Av. Reyes Católicos 2, 28040 Madrid, Spain, <sup>2</sup>Department of Molecular and Cell Biology, Centro Nacional de Biotecnología (CNB-CSIC), Consejo Superior de Investigaciones Científicas (CSIC), Campus de Cantoblanco, 28049 Madrid, Spain, <sup>3</sup>Centro de Biología Molecular “Severo Ochoa” (CSIC-UAM), Consejo Superior de Investigaciones Científicas (CSIC), Campus de Cantoblanco, 28049 Madrid, Spain, <sup>4</sup>Centro de Investigación Biomédica en Red de Enfermedades Hepáticas y Digestivas (CIBERehd), Instituto de Salud Carlos III, 28029 Madrid, Spain, <sup>5</sup>Structural Biology Department, Institut de Biologia Molecular de Barcelona CSIC, 08028 Barcelona, Spain, <sup>6</sup>Department of Genetics & Genomics, Instituto de Investigación Sanitaria-Fundación Jiménez Díaz University Hospital, Universidad Autónoma de Madrid (IIS-FJD, UAM), Av. Reyes Católicos 2, 28040 Madrid, Spain, <sup>7</sup>Centre for Biomedical Network Research on Rare Diseases (CIBERER), Instituto de Salud Carlos III, 28029 Madrid, Spain, <sup>8</sup>Bioinformatics Unit, Instituto de Investigación Sanitaria-Fundación Jiménez Díaz University Hospital, Universidad Autónoma de Madrid (IIS-FJD, UAM), Madrid 28040, Spain, <sup>9</sup>Biotechvana, “Scientific Park”, Universidad de Valencia, 46980 Valencia, Spain, <sup>10</sup>Unidad de Genómica, “Scientific Park of Madrid”, Campus de Cantoblanco, 28049 Madrid, Spain, <sup>11</sup>Departamento de Biología Molecular, Universidad Autónoma de Madrid, Campus de Cantoblanco, 28049, Madrid, Spain, <sup>12</sup>Departamento de Sistemas Informáticos, Escuela Técnica Superior de Ingeniería de Sistemas Informáticos (ETSISI), Universidad Politécnica de Madrid, Madrid, Spain, <sup>13</sup>Departamento de Bioquímica y Biología Molecular, Universidad Complutense de Madrid, Madrid, Spain, <sup>14</sup>Unidad de Virología Molecular, Laboratorio de Referencia e Investigación en Retrovirus, Centro Nacional de Microbiología, Instituto de Salud Carlos III, Majadahonda, Madrid, Spain, <sup>15</sup>Instituto de Parasitología y Biomedicina ‘López-Neyra’ (CSIC), Parque Tecnológico Ciencias de la Salud, Armilla, 18016 Granada, Spain, <sup>16</sup>Allergy Unit, Hospital Infanta Elena, Valdemoro, Madrid, Spain; <sup>17</sup>Instituto de Investigación Sanitaria-Fundación Jiménez Díaz University Hospital, Universidad Autónoma de Madrid (IIS-FJD, UAM), Av. Reyes Católicos 2, 28040 Madrid, Spain; <sup>18</sup>Faculty of Medicine, Universidad Francisco de Vitoria, Madrid, Spain

\*Corresponding authors: Celia Perales ([celia.perales@cnb.csic.es](mailto:celia.perales@cnb.csic.es)) and Esteban Domingo ([edomingo@cbm.csic.es](mailto:edomingo@cbm.csic.es))

**Table S1.** Oligonucleotides used to amplify the nsp12 (polymerase)- and spike-coding regions of SARS-CoV-2.

| Region       | Sense | Primer name       | Sequence (5'–3')         | Genome positions <sup>a</sup> | T <sub>m</sub> (°C) |
|--------------|-------|-------------------|--------------------------|-------------------------------|---------------------|
| <b>nsp12</b> | Fw    | nsp12-CoV2-u14511 | GGATGTAACTTACATAGCTCTA   | 14511-14533                   | 49.9                |
|              | Rv    | nsp12-CoV2-d14942 | GATTTGTCTAGGTTGTTGACGA   | 14942-14921                   | 51.1                |
|              | Fw    | nsp12-CoV2-u14890 | GATGGTGGCTGTATTAATGCT    | 14890-14910                   | 50.5                |
|              | Rv    | nsp12-CoV2-d15320 | GGGATGGCTCTATCACATTTA    | 15320-15300                   | 50.5                |
|              | Fw    | nsp12-CoV2-u15268 | GAAAACCCTCACCTTATGGG     | 15268-15287                   | 51.8                |
|              | Rv    | nsp12-CoV2-d15717 | AGAGAGTATCATCATTGAGAAATG | 15717-15694                   | 50.6                |
|              | Fw    | nsp12-CoV2-u15646 | GATGTTGACACAGACTTTGTGAA  | 15646-15668                   | 51.7                |
|              | Rv    | nsp12-CoV2-d16075 | CAGCATACTCCTGATTAGGAT    | 16075-16055                   | 50.5                |
| <b>spike</b> | Fw    | spk-CoV2-u22853   | GGCTGCGTTATAGCTTGGA      | 22853-22871                   | 51.1                |
|              | Rv    | spk-CoV2-d23288   | CAGCATCAGTAGTGTCAGCA     | 23288-23269                   | 51.8                |
|              | Fw    | spk-CoV2-u23236   | GTTTCTGCCTTTCCAACAATTTG  | 23236-23258                   | 51.7                |
|              | Rv    | spk-CoV2-d23666   | CTGCACCAAGTGACATAGTGT    | 23666-23646                   | 52.4                |

<sup>a</sup>The SARS-CoV-2 genome residue numbering is according to the NCBI reference sequence (accession number NC\_045512.2).

**Table S2.** Number of clean reads obtained in SARS-CoV-2 infected patients with a cut-off of 0.1%.

| Patient | Amplicons |         |         |         |         |         | Total   |
|---------|-----------|---------|---------|---------|---------|---------|---------|
|         | A1        | A2      | A3      | A4      | A5      | A6      |         |
| Pt341   | 63,555    | 39,003  | 72,981  | 65,495  | 82,712  | 76,115  | 399,861 |
| Pt342   | 82,712    | 60,165  | 91,095  | 85,240  | 104,974 | 94,499  | 518,685 |
| Pt354   | 79,940    | 80,889  | 111,591 | 112,259 | 130,537 | 110,655 | 625,871 |
| Pt416   | 114,111   | 112,911 | 160,777 | 116,627 | nd      | 142,232 | 646,658 |
| Pt417   | 118,569   | 69,823  | 102,383 | 95,960  | 130,990 | 128,259 | 645,984 |
| Pt426   | 150,647   | 75,589  | 130,013 | 170,598 | 146,732 | 111,163 | 784,742 |
| Pt427   | 132,011   | 101,021 | 172,554 | 133,988 | nd      | 136,749 | 676,323 |
| Pt441   | 93,828    | 103,492 | 98,941  | 92,164  | 82,660  | 112,545 | 583,630 |
| Pt443   | 90,974    | 79,714  | 84,655  | 85,457  | 89,970  | 89,580  | 520,350 |
| Pt448   | 91,036    | 70,524  | 93,156  | 88,410  | 124,340 | 99,446  | 566,912 |
| Pt106   | 133,442   | 140,207 | 155,602 | 124,104 | 181,128 | 160,437 | 894,920 |
| Pt130   | 126,346   | 128,606 | 149,404 | 124,206 | 172,770 | 146,875 | 848,207 |
| Pt138   | 125,001   | 144,501 | 196,471 | 110,230 | 141,596 | 192,928 | 910,727 |
| Pt142   | 89,514    | 96,501  | 114,938 | 75,965  | 86,840  | 104,886 | 568,644 |
| Pt145   | 121,228   | 133,986 | 158,181 | 147,049 | 189,110 | 145,894 | 895,448 |
| Pt148   | 114,793   | 83,090  | 172,961 | 133,897 | 156,290 | 154,926 | 815,957 |
| Pt150   | 99,291    | 86,793  | 118,571 | 143,375 | 178,313 | 161,908 | 788,251 |
| Pt165   | 146,728   | 109,106 | 149,414 | 136,126 | 215,662 | 140,709 | 897,745 |
| Pt168   | 140,170   | 109,016 | 148,138 | 147,460 | 164,144 | 166,348 | 875,276 |
| Pt182   | 137,787   | 115,948 | 167,192 | 149,942 | 177,236 | 154,440 | 902,545 |
| Pt012   | 137,663   | 115,247 | 143,248 | 114,790 | 172,779 | 129,763 | 813,490 |
| Pt013   | 93,294    | 78,621  | 94,140  | 91,933  | 110,291 | 88,725  | 557,004 |
| Pt017   | 91,865    | 48,108  | 90,196  | 76,281  | 89,520  | 88,153  | 484,123 |
| Pt020   | 79,558    | 72,137  | 86,046  | 83,132  | 116,157 | 70,143  | 507,173 |
| Pt023   | 87,922    | 74,407  | 111,557 | 91,144  | 97,039  | 81,826  | 543,895 |
| Pt032   | 88,004    | 76,066  | 91,800  | 87,811  | 95,603  | 91,222  | 530,506 |
| Pt036   | 74,328    | 64,278  | 75,479  | 79,503  | nd      | 82,090  | 375,678 |
| Pt040   | 57,515    | 43,973  | 53,626  | 51,165  | 60,104  | 50,844  | 317,227 |
| Pt045   | 101,977   | 84,026  | 95,976  | 97,520  | 113,687 | 96,802  | 589,988 |
| Pt047   | 86,472    | 78,295  | 89,128  | 90,025  | 93,607  | 80,551  | 518,078 |
| Average | 105,009   | 89,201  | 119,340 | 106,729 | 129,807 | 116,357 |         |

**nd:** no data

**Table S3.** Repertoire of point mutations and amino acid substitutions identified in SARS-CoV-2 in nsp12 (polymerase)- and spike-coding regions.

| Region <sup>a</sup> | Mutation <sup>b</sup> | Type<br>(Ts/Tv) <sup>c</sup> | Substitution <sup>d</sup> | Type<br>(Syn/Non-syn) <sup>e</sup> | PAM250 <sup>f</sup> | SNAP2 <sup>g</sup> | Number of patients |          |        |
|---------------------|-----------------------|------------------------------|---------------------------|------------------------------------|---------------------|--------------------|--------------------|----------|--------|
|                     |                       |                              |                           |                                    |                     |                    | Mild               | Moderate | Exitus |
| nsp12 A1            | T14537C               | Ts                           | L366P                     | Non-syn                            | -3                  | effect (55)        | 6                  | 4        | 7      |
| nsp12 A1            | T14538C               | Ts                           | L366                      | Syn                                |                     |                    | 1                  | 0        | 0      |
| nsp12 A1            | T14541C               | Ts                           | S367                      | Syn                                |                     |                    | 10                 | 10       | 10     |
| nsp12 A1            | T14543C               | Ts                           | F368S                     | Non-syn                            | -3                  | effect (9)         | 1                  | 0        | 0      |
| nsp12 A1            | T14551C               | Ts                           | L371                      | Syn                                |                     |                    | 1                  | 0        | 2      |
| nsp12 A1            | C14554T               | Ts                           | L372F                     | Non-syn                            | 2                   | effect (8)         | 0                  | 0        | 1      |
| nsp12 A1            | T14555C               | Ts                           | L372P                     | Non-syn                            | -3                  | effect (45)        | 10                 | 9        | 10     |
| nsp12 A1            | T14556C               | Ts                           | L372                      | Syn                                |                     |                    | 1                  | 0        | 0      |
| nsp12 A1            | T14558C               | Ts                           | V373A                     | Non-syn                            | 0                   | neutral (-55)      | 7                  | 1        | 4      |
| nsp12 A1            | T14560C               | Ts                           | Y374H                     | Non-syn                            | 0                   | effect (62)        | 1                  | 0        | 0      |
| nsp12 A1            | T14562C               | Ts                           | Y374                      | Syn                                |                     |                    | 7                  | 5        | 5      |
| nsp12 A1            | T14565C               | Ts                           | A375                      | Syn                                |                     |                    | 6                  | 5        | 6      |
| nsp12 A1            | T14568C               | Ts                           | A376                      | Syn                                |                     |                    | 8                  | 10       | 9      |
| nsp12 A1            | A14570G               | Ts                           | D377G                     | Non-syn                            | 1                   | effect (36)        | 1                  | 0        | 1      |
| nsp12 A1            | T14574C               | Ts                           | P378                      | Syn                                |                     |                    | 10                 | 8        | 9      |
| nsp12 A1            | C14576T               | Ts                           | A379V                     | Non-syn                            | 0                   | effect (9)         | 1                  | 0        | 0      |
| nsp12 A1            | T14577C               | Ts                           | A379                      | Syn                                |                     |                    | 2                  | 0        | 0      |
| nsp12 A1            | T14579C               | Ts                           | M380T                     | Non-syn                            | -1                  | neutral (-46)      | 7                  | 7        | 8      |
| nsp12 A1            | A14582G               | Ts                           | H381R                     | Non-syn                            | 2                   | neutral (-57)      | 3                  | 2        | 2      |
| nsp12 A1            | C14583T               | Ts                           | H381                      | Syn                                |                     |                    | 1                  | 0        | 0      |
| nsp12 A1            | C14585T               | Ts                           | A382V                     | Non-syn                            | 0                   | neutral (-94)      | 1                  | 0        | 0      |
| nsp12 A1            | T14586C               | Ts                           | A382                      | Syn                                |                     |                    | 4                  | 1        | 2      |
| nsp12 A1            | T14589C               | Ts                           | A383                      | Syn                                |                     |                    | 10                 | 10       | 10     |
| nsp12 A1            | T14590C               | Ts                           | S384P                     | Non-syn                            | 1                   | effect (21)        | 10                 | 10       | 10     |
| nsp12 A1            | T14592C               | Ts                           | S384                      | Syn                                |                     |                    | 5                  | 3        | 3      |
| nsp12 A1            | T14595C               | Ts                           | G385                      | Syn                                |                     |                    | 2                  | 1        | 0      |
| nsp12 A1            | A14597G               | Ts                           | N386S                     | Non-syn                            | 1                   | neutral (-94)      | 0                  | 1        | 0      |
| nsp12 A1            | T14598C               | Ts                           | N386                      | Syn                                |                     |                    | 1                  | 0        | 2      |
| nsp12 A1            | T14602C               | Ts                           | L388                      | Syn                                |                     |                    | 2                  | 0        | 1      |
| nsp12 A1            | T14606C               | Ts                           | L389P                     | Non-syn                            | -3                  | effect (59)        | 1                  | 0        | 1      |
| nsp12 A1            | A14607G               | Ts                           | L389                      | Syn                                |                     |                    | 1                  | 0        | 0      |
| nsp12 A1            | A14609G <sup>h</sup>  | Ts                           | D390G                     | Non-syn                            | 1                   | effect (14)        | 0                  | 0        | 1      |
| nsp12 A1            | A14613G               | Ts                           | K391                      | Syn                                |                     |                    | 2                  | 0        | 2      |
| nsp12 A1            | A14617G               | Ts                           | T393A                     | Non-syn                            | 1                   | neutral (-1)       | 3                  | 1        | 3      |
| nsp12 A1            | T14619C               | Ts                           | T393                      | Syn                                |                     |                    | 1                  | 0        | 0      |

|          |         |    |       |         |    |               |    |    |    |
|----------|---------|----|-------|---------|----|---------------|----|----|----|
| nsp12 A1 | T14623C | Ts | C395R | Non-syn | -4 | effect (71)   | 9  | 8  | 7  |
| nsp12 A1 | T14626C | Ts | F396L | Non-syn | 2  | neutral (-86) | 10 | 10 | 10 |
| nsp12 A1 | T14627C | Ts | F396S | Non-syn | -3 | effect (53)   | 5  | 0  | 4  |
| nsp12 A1 | T14628C | Ts | F396  | Syn     |    |               | 3  | 0  | 2  |
| nsp12 A1 | T14629C | Ts | S397P | Non-syn | 1  | effect (56)   | 1  | 0  | 0  |
| nsp12 A1 | A14631G | Ts | S397  | Syn     |    |               | 2  | 0  | 1  |
| nsp12 A1 | T14633C | Ts | V398A | Non-syn | 0  | neutral (-73) | 2  | 0  | 1  |
| nsp12 A1 | T14637C | Ts | A399  | Syn     |    |               | 10 | 10 | 10 |
| nsp12 A1 | T14642C | Ts | L401P | Non-syn | -3 | effect (20)   | 6  | 5  | 6  |
| nsp12 A1 | T14646C | Ts | T402  | Syn     |    |               | 4  | 0  | 1  |
| nsp12 A1 | A14647G | Ts | N403D | Non-syn | 2  | neutral (-88) | 1  | 0  | 0  |
| nsp12 A1 | A14648G | Ts | N403S | Non-syn | 1  | neutral (-91) | 4  | 2  | 1  |
| nsp12 A1 | T14652C | Ts | N404  | Syn     |    |               | 1  | 0  | 0  |
| nsp12 A1 | T14654C | Ts | V405A | Non-syn | 0  | neutral (-57) | 10 | 10 | 10 |
| nsp12 A1 | T14655C | Ts | V405  | Syn     |    |               | 5  | 3  | 4  |
| nsp12 A1 | T14658C | Ts | A406  | Syn     |    |               | 10 | 10 | 10 |
| nsp12 A1 | T14659C | Ts | F407L | Non-syn | 2  | neutral (-81) | 8  | 9  | 9  |
| nsp12 A1 | T14660C | Ts | F407S | Non-syn | -3 | neutral (-40) | 1  | 0  | 1  |
| nsp12 A1 | T14661C | Ts | F407  | Syn     |    |               | 0  | 0  | 1  |
| nsp12 A1 | A14663G | Ts | Q408R | Non-syn | 1  | effect (4)    | 2  | 0  | 0  |
| nsp12 A1 | A14665G | Ts | T409A | Non-syn | 1  | neutral (-56) | 8  | 7  | 9  |
| nsp12 A1 | T14667C | Ts | T409  | Syn     |    |               | 3  | 0  | 2  |
| nsp12 A1 | T14669C | Ts | V410A | Non-syn | 0  | neutral (-45) | 10 | 10 | 10 |
| nsp12 A1 | A14671G | Ts | K411E | Non-syn | 0  | effect (44)   | 7  | 5  | 5  |
| nsp12 A1 | A14672G | Ts | K411R | Non-syn | 3  | neutral (-87) | 1  | 0  | 2  |
| nsp12 A1 | A14673G | Ts | K411  | Syn     |    |               | 10 | 10 | 10 |
| nsp12 A1 | C14676T | Ts | P412  | Syn     |    |               | 1  | 0  | 0  |
| nsp12 A1 | T14679C | Ts | G413  | Syn     |    |               | 1  | 0  | 0  |
| nsp12 A1 | A14687G | Ts | N416S | Non-syn | 1  | neutral (-39) | 4  | 1  | 5  |
| nsp12 A1 | A14691G | Ts | K417  | Syn     |    |               | 9  | 9  | 10 |
| nsp12 A1 | A14693G | Ts | D418G | Non-syn | 1  | effect (9)    | 8  | 10 | 10 |
| nsp12 A1 | C14694T | Ts | D418  | Syn     |    |               | 1  | 0  | 0  |
| nsp12 A1 | T14695C | Ts | F419L | Non-syn | 2  | effect (31)   | 10 | 10 | 10 |
| nsp12 A1 | T14700C | Ts | Y420  | Syn     |    |               | 6  | 3  | 4  |
| nsp12 A1 | A14702G | Ts | D421G | Non-syn | 1  | neutral (-7)  | 10 | 10 | 10 |
| nsp12 A1 | T14704C | Ts | F422L | Non-syn | 2  | neutral (-25) | 10 | 10 | 10 |
| nsp12 A1 | T14709C | Ts | A423  | Syn     |    |               | 10 | 10 | 10 |
| nsp12 A1 | T14711C | Ts | V424A | Non-syn | 0  | neutral (-69) | 10 | 10 | 10 |
| nsp12 A1 | T14713C | Ts | S425P | Non-syn | 1  | neutral (-36) | 10 | 10 | 10 |
| nsp12 A1 | A14717G | Ts | K426R | Non-syn | 3  | neutral (-93) | 8  | 5  | 7  |
| nsp12 A1 | T14721C | Ts | G427  | Syn     |    |               | 10 | 10 | 10 |

|          |                      |    |       |         |    |               |    |    |    |
|----------|----------------------|----|-------|---------|----|---------------|----|----|----|
| nsp12 A1 | T14722C              | Ts | F428L | Non-syn | 2  | neutral (-85) | 2  | 0  | 2  |
| nsp12 A1 | T14723C              | Ts | F428S | Non-syn | -3 | effect (21)   | 3  | 0  | 2  |
| nsp12 A1 | C14724T              | Ts | F428  | Syn     |    |               | 1  | 0  | 0  |
| nsp12 A1 | T14725C              | Ts | F429L | Non-syn | 2  | neutral (-94) | 5  | 0  | 2  |
| nsp12 A1 | A14729G              | Ts | K430R | Non-syn | 3  | neutral (-84) | 10 | 10 | 10 |
| nsp12 A1 | A14732G              | Ts | E431G | Non-syn | 0  | effect (15)   | 4  | 1  | 4  |
| nsp12 A1 | A14733G              | Ts | E431  | Syn     |    |               | 10 | 10 | 10 |
| nsp12 A1 | A14736G              | Ts | G432  | Syn     |    |               | 1  | 0  | 2  |
| nsp12 A1 | A14737G              | Ts | S433G | Non-syn | 1  | neutral (-79) | 10 | 10 | 10 |
| nsp12 A1 | T14739C              | Ts | S433  | Syn     |    |               | 10 | 10 | 9  |
| nsp12 A1 | T14740C              | Ts | S434P | Non-syn | 1  | neutral (-82) | 8  | 10 | 9  |
| nsp12 A1 | T14742C              | Ts | S434  | Syn     |    |               | 2  | 0  | 0  |
| nsp12 A1 | T14744C              | Ts | V435A | Non-syn | 0  | neutral (-25) | 4  | 0  | 2  |
| nsp12 A1 | T14745C              | Ts | V435  | Syn     |    |               | 4  | 0  | 1  |
| nsp12 A1 | A14747G              | Ts | E436G | Non-syn | 0  | neutral (-64) | 1  | 0  | 2  |
| nsp12 A1 | A14754G              | Ts | K438  | Syn     | 0  |               | 10 | 10 | 10 |
| nsp12 A1 | A14756G              | Ts | H439R | Non-syn | 2  | effect (56)   | 4  | 1  | 3  |
| nsp12 A1 | T14758C              | Ts | F440L | Non-syn | 2  | effect (26)   | 10 | 10 | 10 |
| nsp12 A1 | T14759C              | Ts | F440S | Non-syn | -3 | effect (35)   | 2  | 0  | 2  |
| nsp12 A1 | T14761C              | Ts | F441L | Non-syn | 2  | effect (42)   | 10 | 10 | 10 |
| nsp12 A1 | T14762C              | Ts | F441S | Non-syn | -3 | effect (56)   | 1  | 0  | 0  |
| nsp12 A1 | T14764C              | Ts | F442L | Non-syn | 2  | effect (37)   | 8  | 5  | 5  |
| nsp12 A1 | T14765C              | Ts | F442S | Non-syn | -3 | effect (26)   | 1  | 0  | 0  |
| nsp12 A1 | T14766C              | Ts | F442  | Syn     |    |               | 1  | 0  | 0  |
| nsp12 A1 | T14769C              | Ts | A443  | Syn     |    |               | 10 | 9  | 10 |
| nsp12 A1 | A14771G              | Ts | Q444R | Non-syn | 1  | effect (19)   | 9  | 6  | 5  |
| nsp12 A1 | A14774G              | Ts | D445G | Non-syn | 1  | effect (20)   | 10 | 10 | 10 |
| nsp12 A1 | T14775C              | Ts | D445  | Syn     |    |               | 2  | 0  | 0  |
| nsp12 A1 | T14778C              | Ts | G446  | Syn     |    |               | 0  | 0  | 1  |
| nsp12 A1 | A14780G              | Ts | N447S | Non-syn | 1  | neutral (-92) | 3  | 0  | 1  |
| nsp12 A1 | T14784C              | Ts | A448  | Syn     |    |               | 5  | 5  | 4  |
| nsp12 A1 | C14786T              | Ts | A449V | Non-syn | 0  | neutral (-21) | 1  | 0  | 0  |
| nsp12 A1 | T14789C              | Ts | I450T | Non-syn | 0  | neutral (-46) | 4  | 1  | 3  |
| nsp12 A1 | A14791G              | Ts | S451G | Non-syn | 1  | neutral (-47) | 8  | 6  | 5  |
| nsp12 A1 | T14796C              | Ts | D452  | Syn     |    |               | 3  | 0  | 1  |
| nsp12 A1 | A14801G              | Ts | D454G | Non-syn | 1  | effect (20)   | 10 | 10 | 10 |
| nsp12 A1 | A14804G              | Ts | Y455C | Non-syn | 0  | effect (27)   | 1  | 0  | 0  |
| nsp12 A1 | C14805T <sup>i</sup> | Ts | Y455  | Syn     |    |               | 2  | 2  | 1  |
| nsp12 A1 | T14808C              | Ts | Y456  | Syn     |    |               | 3  | 0  | 3  |
| nsp12 A1 | T14811C              | Ts | R457  | Syn     |    |               | 4  | 1  | 2  |
| nsp12 A1 | T14814C              | Ts | Y458  | Syn     |    |               | 1  | 0  | 0  |

|          |         |    |       |         |    |               |    |    |    |
|----------|---------|----|-------|---------|----|---------------|----|----|----|
| nsp12 A1 | A14816G | Ts | N459S | Non-syn | 1  | neutral (-22) | 1  | 0  | 0  |
| nsp12 A1 | T14817C | Ts | N459  | Syn     |    |               | 1  | 0  | 1  |
| nsp12 A1 | A14820G | Ts | L460  | Syn     |    |               | 2  | 0  | 0  |
| nsp12 A1 | A14823G | Ts | P461  | Syn     |    |               | 7  | 7  | 7  |
| nsp12 A1 | A14824G | Ts | T462A | Non-syn | 1  | neutral (-41) | 7  | 5  | 5  |
| nsp12 A1 | A14826G | Ts | T462  | Syn     |    |               | 1  | 0  | 0  |
| nsp12 A1 | A14827G | Ts | M463V | Non-syn | 2  | neutral (-27) | 1  | 0  | 1  |
| nsp12 A1 | T14828C | Ts | M463T | Non-syn | -1 | effect (63)   | 3  | 0  | 0  |
| nsp12 A1 | T14830C | Ts | C464R | Non-syn | -4 | effect (61)   | 7  | 7  | 8  |
| nsp12 A1 | T14832C | Ts | C464  | Syn     |    |               | 5  | 2  | 5  |
| nsp12 A1 | A14834G | Ts | D465G | Non-syn | 1  | effect (28)   | 10 | 10 | 10 |
| nsp12 A1 | A14836G | Ts | I466V | Non-syn | 4  | neutral (-71) | 2  | 0  | 0  |
| nsp12 A1 | T14837C | Ts | I466T | Non-syn | 0  | effect (5)    | 5  | 1  | 4  |
| nsp12 A1 | A14839G | Ts | R467G | Non-syn | -3 | neutral (-15) | 8  | 7  | 5  |
| nsp12 A1 | A14841G | Ts | R467  | Syn     |    |               | 10 | 10 | 10 |
| nsp12 A1 | A14843G | Ts | Q468R | Non-syn | 1  | effect (30)   | 4  | 2  | 6  |
| nsp12 A1 | A14844G | Ts | Q468  | Syn     |    |               | 6  | 8  | 8  |
| nsp12 A1 | A14847G | Ts | L469  | Syn     |    |               | 0  | 0  | 1  |
| nsp12 A1 | T14851C | Ts | F471L | Non-syn | 2  | effect (2)    | 1  | 0  | 0  |
| nsp12 A1 | T14851G | Tv | F471V | Non-syn | -1 | neutral (-54) | 0  | 4  | 1  |
| nsp12 A1 | T14853C | Ts | F471  | Syn     |    |               | 1  | 0  | 0  |
| nsp12 A1 | T14855A | Tv | V472E | Non-syn | -2 | neutral (-36) | 0  | 4  | 1  |
| nsp12 A1 | T14858C | Ts | V473A | Non-syn | 0  | neutral (-52) | 2  | 0  | 0  |
| nsp12 A1 | T14859C | Ts | V473  | Syn     |    |               | 1  | 0  | 0  |
| nsp12 A1 | A14861G | Ts | E474G | Non-syn | 0  | neutral (-7)  | 2  | 0  | 2  |
| nsp12 A1 | A14862G | Ts | E474  | Syn     |    |               | 9  | 5  | 7  |
| nsp12 A1 | T14864C | Ts | V475A | Non-syn | 0  | neutral (-23) | 2  | 0  | 0  |
| nsp12 A1 | T14867C | Ts | V476A | Non-syn | 0  | neutral (-54) | 3  | 0  | 2  |
| nsp12 A1 | T14868C | Ts | V476  | Syn     |    |               | 0  | 0  | 2  |
| nsp12 A1 | A14870G | Ts | D477G | Non-syn | 1  | neutral (-30) | 9  | 3  | 5  |
| nsp12 A1 | A14872G | Ts | K478E | Non-syn | 0  | neutral (-51) | 1  | 0  | 0  |
| nsp12 A1 | A14873G | Ts | K478R | Non-syn | 3  | neutral (-77) | 10 | 7  | 7  |
| nsp12 A1 | A14876G | Ts | Y479C | Non-syn | 0  | effect (11)   | 1  | 0  | 0  |
| nsp12 A1 | T14878C | Ts | F480L | Non-syn | 2  | neutral (-47) | 4  | 1  | 1  |
| nsp12 A1 | T14879C | Ts | F480S | Non-syn | -3 | effect (34)   | 1  | 0  | 0  |
| nsp12 A1 | A14882G | Ts | D481G | Non-syn | 1  | neutral (-54) | 0  | 0  | 1  |
| nsp12 A1 | T14886C | Ts | C482  | Syn     |    |               | 0  | 0  | 2  |
| nsp12 A1 | A14888G | Ts | Y483C | Non-syn | 0  | effect (42)   | 2  | 0  | 1  |
| nsp12 A1 | A14891G | Ts | D484G | Non-syn | 1  | effect (42)   | 10 | 10 | 10 |
| nsp12 A1 | T14892C | Ts | D484  | Syn     |    |               | 1  | 0  | 0  |
| nsp12 A1 | C14898T | Ts | G486  | Syn     |    |               | 0  | 1  | 0  |

|             |         |    |       |         |    |               |    |    |    |
|-------------|---------|----|-------|---------|----|---------------|----|----|----|
| nsp12 A1    | T14899C | Ts | C487R | Non-syn | -4 | neutral (-37) | 5  | 0  | 1  |
| nsp12 A1    | T14903C | Ts | I488T | Non-syn | 0  | effect (2)    | 2  | 0  | 0  |
| nsp12 A1    | A14905G | Ts | N489D | Non-syn | 2  | neutral (-77) | 1  | 0  | 0  |
| nsp12 A1    | A14906G | Ts | N489S | Non-syn | 1  | neutral (-97) | 1  | 0  | 0  |
| nsp12 A1    | A14911G | Ts | N491D | Non-syn | 2  | neutral (-72) | 3  | 1  | 1  |
| nsp12 A1    | A14912G | Ts | N491S | Non-syn | 1  | neutral (-89) | 1  | 1  | 1  |
| nsp12 A1/A2 | C14914A | Tv | Q492K | Non-syn | 1  | neutral (-10) | 0  | 0  | 1  |
| nsp12 A1/A2 | A14916G | Ts | Q492  | Syn     |    |               | 10 | 7  | 9  |
| nsp12 A2    | T14918C | Ts | V493A | Non-syn | 0  | neutral (-12) | 10 | 10 | 10 |
| nsp12 A1    | A14920G | Ts | I494V | Non-syn | 4  | neutral (-96) | 5  | 3  | 7  |
| nsp12 A2    | T14921C | Ts | I494T | Non-syn | 0  | neutral (-13) | 4  | 1  | 2  |
| nsp12 A2    | G14923A | Ts | V495I | Non-syn | 4  | neutral (-80) | 1  | 0  | 0  |
| nsp12 A2    | T14924C | Ts | V495A | Non-syn | 0  | effect (1)    | 10 | 10 | 10 |
| nsp12 A2    | C14925T | Ts | V495  | Syn     |    |               | 0  | 1  | 0  |
| nsp12 A2    | A14930G | Ts | N497S | Non-syn | 1  | effect (6)    | 3  | 0  | 1  |
| nsp12 A2    | C14931T | Ts | N497  | Syn     |    |               | 0  | 0  | 1  |
| nsp12 A2    | A14936G | Ts | D499G | Non-syn | 1  | effect (70)   | 6  | 5  | 5  |
| nsp12 A2    | T14946C | Ts | A502  | Syn     |    |               | 6  | 6  | 5  |
| nsp12 A2    | T14949C | Ts | G503  | Syn     |    |               | 10 | 10 | 10 |
| nsp12 A2    | T14950C | Ts | F504L | Non-syn | 2  | effect (30)   | 5  | 6  | 2  |
| nsp12 A2    | T14951C | Ts | F504S | Non-syn | -3 | effect (59)   | 10 | 9  | 8  |
| nsp12 A2    | A14964G | Ts | K508  | Syn     |    |               | 2  | 0  | 1  |
| nsp12 A2    | T14976C | Ts | A512  | Syn     |    |               | 7  | 6  | 7  |
| nsp12 A2    | A14979G | Ts | R513  | Syn     |    |               | 4  | 1  | 2  |
| nsp12 A2    | T14981C | Ts | L514P | Non-syn | -3 | neutral (-34) | 10 | 9  | 9  |
| nsp12 A2    | T14985C | Ts | Y515  | Syn     |    |               | 1  | 0  | 0  |
| nsp12 A2    | T14986C | Ts | Y516H | Non-syn | 0  | effect (57)   | 1  | 0  | 0  |
| nsp12 A2    | T14988C | Ts | Y516  | Syn     |    |               | 3  | 0  | 0  |
| nsp12 A2    | A14990G | Ts | D517G | Non-syn | 1  | effect (46)   | 1  | 0  | 0  |
| nsp12 A2    | T14992C | Ts | S518P | Non-syn | 1  | effect (3)    | 1  | 0  | 0  |
| nsp12 A2    | A14998G | Ts | S520G | Non-syn | 1  | neutral (-80) | 7  | 2  | 8  |
| nsp12 A2    | T15000C | Ts | S520  | Syn     |    |               | 9  | 10 | 10 |
| nsp12 A2    | T15003C | Ts | Y521  | Syn     |    |               | 1  | 0  | 0  |
| nsp12 A2    | G15004A | Ts | E522K | Non-syn | 0  | neutral (-55) | 1  | 0  | 0  |
| nsp12 A2    | A15005G | Ts | E522G | Non-syn | 0  | neutral (-18) | 10 | 8  | 10 |
| nsp12 A2    | T15009C | Ts | D523  | Syn     |    |               | 9  | 10 | 9  |
| nsp12 A2    | A15012G | Ts | Q524  | Syn     |    |               | 7  | 3  | 0  |
| nsp12 A2    | A15014G | Ts | D525G | Non-syn | 1  | effect (26)   | 9  | 10 | 9  |
| nsp12 A2    | T15015C | Ts | D525  | Syn     |    |               | 8  | 8  | 9  |
| nsp12 A2    | C15017T | Ts | A526V | Non-syn | 0  | neutral (-36) | 0  | 0  | 2  |
| nsp12 A2    | A15018G | Ts | A526  | Syn     |    |               | 5  | 6  | 6  |



|          |                      |    |       |         |    |               |    |    |    |
|----------|----------------------|----|-------|---------|----|---------------|----|----|----|
| nsp12 A2 | T15020C              | Ts | L527P | Non-syn | -3 | effect (74)   | 9  | 10 | 10 |
| nsp12 A2 | T15020A <sup>h</sup> | Tv | L527H | Non-syn | -2 | effect (51)   | 1  | 0  | 0  |
| nsp12 A2 | T15022C              | Ts | F528L | Non-syn | 2  | effect (23)   | 1  | 0  | 0  |
| nsp12 A2 | C15024T              | Ts | F528  | Syn     |    |               | 0  | 0  | 1  |
| nsp12 A2 | A15027G              | Ts | A529  | Syn     |    |               | 3  | 0  | 1  |
| nsp12 A2 | A15034G              | Ts | K532E | Non-syn | 0  | effect (51)   | 1  | 0  | 0  |
| nsp12 A2 | A15036G              | Ts | K532  | Syn     |    |               | 9  | 9  | 8  |
| nsp12 A2 | T15044C              | Ts | V535A | Non-syn | 0  | effect (14)   | 10 | 10 | 10 |
| nsp12 A2 | A15046G              | Ts | I536V | Non-syn | 4  | neutral (-27) | 3  | 0  | 5  |
| nsp12 A2 | T15047C              | Ts | I536T | Non-syn | 0  | neutral (-20) | 8  | 7  | 2  |
| nsp12 A2 | T15051C              | Ts | P537  | Syn     |    |               | 1  | 1  | 1  |
| nsp12 A2 | A15058G <sup>h</sup> | Ts | T540A | Non-syn | 1  | effect (27)   | 2  | 0  | 0  |
| nsp12 A2 | T15060C              | Ts | T540  | Syn     |    |               | 9  | 9  | 8  |
| nsp12 A2 | T15069C              | Ts | N543  | Syn     |    |               | 5  | 0  | 1  |
| nsp12 A2 | T15071C              | Ts | L544P | Non-syn | -3 | effect (46)   | 1  | 0  | 0  |
| nsp12 A2 | A15074G              | Ts | K545R | Non-syn | 3  | effect (36)   | 7  | 2  | 4  |
| nsp12 A2 | T15078C              | Ts | Y546  | Syn     |    |               | 6  | 4  | 6  |
| nsp12 A2 | A15082G              | Ts | I548V | Non-syn | 4  | neutral (-35) | 1  | 0  | 0  |
| nsp12 A2 | T15083C              | Ts | I548T | Non-syn | 0  | effect (15)   | 1  | 0  | 0  |
| nsp12 A2 | T15087C              | Ts | S549  | Syn     |    |               | 1  | 0  | 0  |
| nsp12 A2 | A15090G              | Ts | A550  | Syn     |    |               | 5  | 1  | 2  |
| nsp12 A2 | A15092G              | Ts | K551R | Non-syn | 3  | neutral (-25) | 1  | 0  | 0  |
| nsp12 A2 | A15095G              | Ts | N552S | Non-syn | 1  | neutral (-94) | 10 | 10 | 10 |
| nsp12 A2 | A15099G              | Ts | R553  | Syn     |    |               | 10 | 10 | 10 |
| nsp12 A2 | T15102C              | Ts | A554  | Syn     |    |               | 10 | 10 | 9  |
| nsp12 A2 | C15103T              | Ts | R555C | Non-syn | -4 | effect (68)   | 1  | 0  | 0  |
| nsp12 A2 | A15106G              | Ts | T556A | Non-syn | 1  | effect (57)   | 6  | 0  | 2  |
| nsp12 A2 | C15107T              | Ts | T556I | Non-syn | 0  | effect (73)   | 1  | 0  | 0  |
| nsp12 A2 | G15109A              | Ts | V557I | Non-syn | 4  | neutral (-51) | 0  | 0  | 1  |
| nsp12 A2 | T15110C              | Ts | V557A | Non-syn | 0  | effect (22)   | 0  | 0  | 1  |
| nsp12 A2 | A15111G              | Ts | V557  | Syn     |    |               | 1  | 0  | 0  |
| nsp12 A2 | T15114C              | Ts | A558  | Syn     |    |               | 4  | 5  | 4  |
| nsp12 A2 | T15117C              | Ts | G559  | Syn     |    |               | 10 | 8  | 9  |
| nsp12 A2 | T15119C              | Ts | V560A | Non-syn | 0  | effect (3)    | 10 | 10 | 10 |
| nsp12 A2 | T15121C              | Ts | S561P | Non-syn | 1  | effect (68)   | 10 | 10 | 10 |
| nsp12 A2 | T15125C              | Ts | I562T | Non-syn | 0  | effect (20)   | 10 | 9  | 9  |
| nsp12 A2 | T15127C              | Ts | C563R | Non-syn | -4 | effect (78)   | 9  | 8  | 7  |
| nsp12 A2 | T15129C              | Ts | C563  | Syn     |    |               | 0  | 0  | 1  |
| nsp12 A2 | T15135C              | Ts | T565  | Syn     |    |               | 2  | 0  | 0  |
| nsp12 A2 | A15136G              | Ts | M566V | Non-syn | 2  | effect (22)   | 2  | 0  | 0  |
| nsp12 A2 | T15137C              | Ts | M566T | Non-syn | -1 | effect (4)    | 4  | 0  | 1  |

|          |         |    |       |         |    |               |    |    |    |
|----------|---------|----|-------|---------|----|---------------|----|----|----|
| nsp12 A2 | A15139G | Ts | T567A | Non-syn | 1  | neutral (-28) | 10 | 10 | 10 |
| nsp12 A2 | A15143G | Ts | N568S | Non-syn | 1  | neutral (-49) | 5  | 3  | 6  |
| nsp12 A2 | A15145G | Ts | R569G | Non-syn | -3 | effect (79)   | 3  | 0  | 0  |
| nsp12 A2 | A15147G | Ts | R569  | Syn     |    |               | 10 | 10 | 10 |
| nsp12 A2 | A15149G | Ts | Q570R | Non-syn | 1  | neutral (-56) | 1  | 0  | 0  |
| nsp12 A2 | T15151C | Ts | F571L | Non-syn | 2  | neutral (-34) | 10 | 10 | 10 |
| nsp12 A2 | T15152C | Ts | F571S | Non-syn | -3 | effect (51)   | 10 | 10 | 10 |
| nsp12 A2 | T15153C | Ts | F571  | Syn     |    |               | 7  | 4  | 5  |
| nsp12 A2 | T15156C | Ts | H572  | Syn     |    |               | 4  | 2  | 5  |
| nsp12 A2 | A15169G | Ts | K577E | Non-syn | 0  | effect (45)   | 1  | 0  | 0  |
| nsp12 A2 | A15171G | Ts | K577  | Syn     |    |               | 7  | 7  | 6  |
| nsp12 A2 | A15175G | Ts | I579V | Non-syn | 4  | neutral (0)   | 9  | 9  | 10 |
| nsp12 A2 | A15177G | Ts | I579M | Non-syn | 2  | neutral (-64) | 0  | 0  | 1  |
| nsp12 A2 | A15184G | Ts | T582A | Non-syn | 1  | neutral (-60) | 8  | 6  | 5  |
| nsp12 A2 | A15187G | Ts | R583G | Non-syn | -3 | effect (81)   | 2  | 1  | 0  |
| nsp12 A2 | A15189G | Ts | R583  | Syn     |    |               | 10 | 10 | 10 |
| nsp12 A2 | A15192G | Ts | G584  | Syn     |    |               | 10 | 10 | 10 |
| nsp12 A2 | T15195C | Ts | A585  | Syn     |    |               | 1  | 0  | 0  |
| nsp12 A2 | A15196G | Ts | T586A | Non-syn | 1  | neutral (-39) | 1  | 0  | 0  |
| nsp12 A2 | T15198C | Ts | T586  | Syn     |    |               | 8  | 5  | 6  |
| nsp12 A2 | A15210G | Ts | G590  | Syn     |    |               | 2  | 0  | 0  |
| nsp12 A2 | A15211G | Ts | T591A | Non-syn | 1  | effect (34)   | 10 | 10 | 10 |
| nsp12 A2 | A15214G | Ts | S592G | Non-syn | 1  | effect (54)   | 9  | 9  | 7  |
| nsp12 A2 | C15216T | Ts | S592  | Syn     |    |               | 0  | 1  | 0  |
| nsp12 A2 | A15218G | Ts | K593R | Non-syn | 3  | effect (57)   | 1  | 0  | 0  |
| nsp12 A2 | T15228C | Ts | G596  | Syn     |    |               | 1  | 0  | 0  |
| nsp12 A2 | T15231C | Ts | G597  | Syn     |    |               | 1  | 0  | 0  |
| nsp12 A2 | T15232C | Ts | W598R | Non-syn | 2  | effect (90)   | 2  | 1  | 2  |
| nsp12 A2 | A15236G | Ts | H599R | Non-syn | 2  | effect (63)   | 10 | 8  | 7  |
| nsp12 A2 | C15237T | Ts | H599  | Syn     |    |               | 0  | 0  | 1  |
| nsp12 A2 | A15238G | Ts | N600D | Non-syn | 2  | neutral (-64) | 4  | 0  | 4  |
| nsp12 A2 | A15239G | Ts | N600S | Non-syn | 1  | neutral (-86) | 10 | 10 | 10 |
| nsp12 A2 | C15240T | Ts | N600  | Syn     |    |               | 0  | 1  | 1  |
| nsp12 A2 | A15241G | Ts | M601V | Non-syn | 2  | neutral (-27) | 8  | 4  | 5  |
| nsp12 A2 | T15242C | Ts | M601T | Non-syn | -1 | neutral (-10) | 1  | 0  | 0  |
| nsp12 A2 | T15244C | Ts | L602  | Syn     |    |               | 3  | 0  | 1  |
| nsp12 A2 | A15250G | Ts | T604A | Non-syn | 1  | neutral (-62) | 9  | 6  | 9  |
| nsp12 A2 | C15251T | Ts | T604I | Non-syn | 0  | effect (4)    | 0  | 0  | 1  |
| nsp12 A2 | T15254C | Ts | V605A | Non-syn | 0  | neutral (-40) | 6  | 2  | 1  |
| nsp12 A2 | T15255C | Ts | V605  | Syn     |    |               | 1  | 0  | 0  |
| nsp12 A2 | A15259G | Ts | S607G | Non-syn | 1  | neutral (-92) | 1  | 0  | 0  |

|          |         |    |       |         |    |               |    |    |    |
|----------|---------|----|-------|---------|----|---------------|----|----|----|
| nsp12 A2 | T15261C | Ts | S607  | Syn     |    |               | 2  | 0  | 0  |
| nsp12 A2 | A15263G | Ts | D608G | Non-syn | 1  | neutral (-83) | 10 | 10 | 10 |
| nsp12 A2 | A15267G | Ts | V609  | Syn     |    |               | 4  | 0  | 3  |
| nsp12 A2 | A15270G | Ts | E610  | Syn     |    |               | 10 | 10 | 10 |
| nsp12 A2 | A15271G | Ts | N611D | Non-syn | 2  | neutral (-63) | 3  | 0  | 0  |
| nsp12 A2 | A15272G | Ts | N611S | Non-syn | 1  | neutral (-49) | 10 | 10 | 10 |
| nsp12 A2 | T15276C | Ts | P612  | Syn     |    |               | 5  | 0  | 2  |
| nsp12 A2 | A15278G | Ts | H613R | Non-syn | 2  | neutral (-76) | 8  | 10 | 5  |
| nsp12 A2 | T15281C | Ts | L614P | Non-syn | -3 | effect (48)   | 1  | 0  | 0  |
| nsp12 A3 | T15288C | Ts | G616  | Syn     |    |               | 10 | 10 | 10 |
| nsp12 A3 | G15292A | Ts | D618N | Non-syn | 2  | effect (75)   | 1  | 0  | 0  |
| nsp12 A3 | T15294C | Ts | D618  | Syn     |    |               | 6  | 1  | 5  |
| nsp12 A3 | T15297C | Ts | Y619  | Syn     |    |               | 9  | 10 | 9  |
| nsp12 A3 | T15306C | Ts | C622  | Syn     |    |               | 10 | 8  | 8  |
| nsp12 A3 | A15308G | Ts | D623G | Non-syn | 1  | effect (75)   | 2  | 1  | 4  |
| nsp12 A3 | A15312G | Ts | R624  | Syn     |    |               | 9  | 9  | 9  |
| nsp12 A3 | T15317C | Ts | M626T | Non-syn | -1 | effect (44)   | 7  | 6  | 6  |
| nsp12 A3 | T15321C | Ts | P627  | Syn     |    |               | 5  | 5  | 5  |
| nsp12 A3 | A15323G | Ts | N628S | Non-syn | 1  | neutral (-35) | 3  | 0  | 0  |
| nsp12 A3 | A15325G | Ts | M629V | Non-syn | 2  | neutral (-79) | 1  | 0  | 0  |
| nsp12 A3 | T15329C | Ts | L630P | Non-syn | -3 | effect (61)   | 10 | 9  | 7  |
| nsp12 A3 | T15343C | Ts | S635P | Non-syn | 1  | effect (27)   | 10 | 10 | 10 |
| nsp12 A3 | T15347C | Ts | L636P | Non-syn | -3 | effect (39)   | 10 | 10 | 10 |
| nsp12 A3 | T15348C | Ts | L636  | Syn     |    |               | 1  | 0  | 0  |
| nsp12 A3 | T15350C | Ts | V637A | Non-syn | 0  | neutral (-7)  | 10 | 10 | 10 |
| nsp12 A3 | T15351C | Ts | V637  | Syn     |    |               | 10 | 10 | 10 |
| nsp12 A3 | T15353C | Ts | L638P | Non-syn | -3 | effect (67)   | 10 | 10 | 10 |
| nsp12 A3 | T15357C | Ts | A639  | Syn     |    |               | 10 | 10 | 10 |
| nsp12 A3 | C15358T | Ts | R640C | Non-syn | -4 | effect (56)   | 1  | 0  | 0  |
| nsp12 A3 | A15363G | Ts | K641  | Syn     |    |               | 1  | 1  | 1  |
| nsp12 A3 | A15365G | Ts | H642R | Non-syn | 2  | effect (29)   | 1  | 0  | 0  |
| nsp12 A3 | T15366C | Ts | H642  | Syn     |    |               | 0  | 0  | 1  |
| nsp12 A3 | A15369G | Ts | T643  | Syn     |    |               | 5  | 4  | 5  |
| nsp12 A3 | A15370G | Ts | T644A | Non-syn | 1  | neutral (-63) | 9  | 7  | 8  |
| nsp12 A3 | T15373C | Ts | C645R | Non-syn | -4 | effect (69)   | 7  | 6  | 6  |
| nsp12 A3 | T15375C | Ts | C645  | Syn     |    |               | 10 | 10 | 10 |
| nsp12 A3 | T15376C | Ts | C646R | Non-syn | -4 | effect (47)   | 7  | 5  | 6  |
| nsp12 A3 | T15378C | Ts | C646  | Syn     |    |               | 1  | 1  | 1  |
| nsp12 A3 | T15382C | Ts | L648  | Syn     |    |               | 10 | 10 | 10 |
| nsp12 A3 | T15383C | Ts | L648S | Non-syn | -3 | neutral (-73) | 10 | 10 | 10 |
| nsp12 A3 | T15385C | Ts | S649P | Non-syn | 1  | neutral (-59) | 10 | 10 | 10 |

|          |         |    |       |         |    |               |    |    |    |
|----------|---------|----|-------|---------|----|---------------|----|----|----|
| nsp12 A3 | A15387G | Ts | S649  | Syn     |    |               | 8  | 8  | 8  |
| nsp12 A3 | A15389G | Ts | H650R | Non-syn | 2  | effect (7)    | 9  | 9  | 10 |
| nsp12 A3 | T15393C | Ts | R651  | Syn     |    |               | 10 | 10 | 10 |
| nsp12 A3 | T15394C | Ts | F652L | Non-syn | 2  | neutral (-43) | 9  | 10 | 10 |
| nsp12 A3 | T15395C | Ts | F652S | Non-syn | -3 | neutral (-11) | 1  | 0  | 0  |
| nsp12 A3 | T15397C | Ts | Y653H | Non-syn | 0  | effect (23)   | 2  | 2  | 0  |
| nsp12 A3 | A15405G | Ts | L655  | Syn     |    |               | 1  | 0  | 0  |
| nsp12 A3 | T15408C | Ts | A656  | Syn     |    |               | 5  | 8  | 3  |
| nsp12 A3 | A15413G | Ts | E658G | Non-syn | 0  | effect (62)   | 10 | 10 | 9  |
| nsp12 A3 | T15415C | Ts | C659R | Non-syn | -4 | effect (63)   | 10 | 10 | 9  |
| nsp12 A3 | T15417C | Ts | C659  | Syn     |    |               | 8  | 6  | 9  |
| nsp12 A3 | C15419T | Ts | A660V | Non-syn | 0  | neutral (-29) | 1  | 0  | 0  |
| nsp12 A3 | T15420C | Ts | A660  | Syn     |    |               | 10 | 10 | 10 |
| nsp12 A3 | A15423G | Ts | Q661  | Syn     |    |               | 6  | 5  | 4  |
| nsp12 A3 | T15425C | Ts | V662A | Non-syn | 0  | effect (16)   | 1  | 0  | 0  |
| nsp12 A3 | A15430G | Ts | S664G | Non-syn | 1  | effect (6)    | 8  | 8  | 7  |
| nsp12 A3 | T15432C | Ts | S664  | Syn     |    |               | 1  | 0  | 0  |
| nsp12 A3 | A15434G | Ts | E665G | Non-syn | 0  | effect (58)   | 10 | 10 | 9  |
| nsp12 A3 | A15435G | Ts | E665  | Syn     |    |               | 1  | 0  | 0  |
| nsp12 A3 | A15436G | Ts | M666V | Non-syn | 2  | neutral (-78) | 10 | 10 | 10 |
| nsp12 A3 | G15439A | Ts | V667I | Non-syn | 4  | effect (32)   | 1  | 0  | 0  |
| nsp12 A3 | T15440C | Ts | V667A | Non-syn | 0  | neutral (-19) | 10 | 10 | 10 |
| nsp12 A3 | A15442G | Ts | M668V | Non-syn | 2  | neutral (-54) | 3  | 0  | 1  |
| nsp12 A3 | T15443C | Ts | M668T | Non-syn | -1 | neutral (-52) | 7  | 8  | 9  |
| nsp12 A3 | T15445C | Ts | C669R | Non-syn | -4 | effect (50)   | 10 | 10 | 9  |
| nsp12 A3 | T15447C | Ts | C669  | Syn     |    |               | 9  | 8  | 9  |
| nsp12 A3 | T15453C | Ts | G671  | Syn     |    |               | 10 | 10 | 10 |
| nsp12 A3 | T15454C | Ts | S672P | Non-syn | 1  | neutral (-2)  | 8  | 6  | 6  |
| nsp12 A3 | A15456G | Ts | S672  | Syn     |    |               | 7  | 3  | 4  |
| nsp12 A3 | T15458C | Ts | L673P | Non-syn | -3 | effect (74)   | 2  | 0  | 0  |
| nsp12 A3 | T15460C | Ts | Y674H | Non-syn | 0  | effect (71)   | 1  | 0  | 0  |
| nsp12 A3 | T15462C | Ts | Y674  | Syn     |    |               | 1  | 0  | 0  |
| nsp12 A3 | T15464C | Ts | V675A | Non-syn | 0  | neutral (-34) | 3  | 0  | 1  |
| nsp12 A3 | A15468G | Ts | K676  | Syn     |    |               | 6  | 3  | 4  |
| nsp12 A3 | A15471G | Ts | P677  | Syn     |    |               | 4  | 1  | 1  |
| nsp12 A3 | T15474C | Ts | G678  | Syn     |    |               | 7  | 6  | 7  |
| nsp12 A3 | A15477G | Ts | G679  | Syn     |    |               | 3  | 2  | 0  |
| nsp12 A3 | A15478G | Ts | T680A | Non-syn | 1  | effect (54)   | 10 | 10 | 10 |
| nsp12 A3 | T15481C | Ts | S681P | Non-syn | 1  | effect (72)   | 10 | 10 | 10 |
| nsp12 A3 | A15483G | Ts | S681  | Syn     |    |               | 4  | 1  | 2  |
| nsp12 A3 | T15484C | Ts | S682P | Non-syn | 1  | effect (83)   | 8  | 6  | 5  |

|          |                      |    |       |         |    |               |    |    |    |
|----------|----------------------|----|-------|---------|----|---------------|----|----|----|
| nsp12 A3 | A15486G              | Ts | S682  | Syn     |    |               | 6  | 7  | 7  |
| nsp12 A3 | A15489G              | Ts | G683  | Syn     |    |               | 10 | 10 | 10 |
| nsp12 A3 | A15491G              | Ts | D684G | Non-syn | 1  | effect (58)   | 10 | 10 | 10 |
| nsp12 A3 | T15492C              | Ts | D684  | Syn     |    |               | 3  | 0  | 1  |
| nsp12 A3 | A15496G              | Ts | T686A | Non-syn | 1  | effect (41)   | 7  | 4  | 7  |
| nsp12 A3 | A15498G              | Ts | T686  | Syn     |    |               | 2  | 0  | 0  |
| nsp12 A3 | A15499G              | Ts | T687A | Non-syn | 1  | effect (81)   | 3  | 0  | 1  |
| nsp12 A3 | C15503T              | Ts | A688V | Non-syn | 0  | effect (30)   | 1  | 0  | 0  |
| nsp12 A3 | T15504C              | Ts | A688  | Syn     |    |               | 9  | 6  | 8  |
| nsp12 A3 | A15506G              | Ts | Y689C | Non-syn | 0  | effect (69)   | 1  | 0  | 0  |
| nsp12 A3 | T15507C              | Ts | Y689  | Syn     |    |               | 4  | 0  | 3  |
| nsp12 A3 | T15510C              | Ts | A690  | Syn     |    |               | 1  | 0  | 0  |
| nsp12 A3 | T15516C              | Ts | S692  | Syn     |    |               | 2  | 1  | 0  |
| nsp12 A3 | T15518C              | Ts | V693A | Non-syn | 0  | neutral (-41) | 9  | 7  | 7  |
| nsp12 A3 | A15524G              | Ts | N695S | Non-syn | 1  | effect (16)   | 9  | 6  | 8  |
| nsp12 A3 | T15527C              | Ts | I696T | Non-syn | 0  | neutral (-7)  | 1  | 0  | 1  |
| nsp12 A3 | T15531C              | Ts | C697  | Syn     |    |               | 10 | 10 | 10 |
| nsp12 A3 | A15533G <sup>h</sup> | Ts | Q698R | Non-syn | 1  | effect (63)   | 9  | 10 | 10 |
| nsp12 A3 | A15534G              | Ts | Q698  | Syn     |    |               | 9  | 10 | 10 |
| nsp12 A3 | T15537C              | Ts | A699  | Syn     |    |               | 9  | 10 | 9  |
| nsp12 A3 | T15539C              | Ts | V700A | Non-syn | 0  | neutral (-17) | 10 | 10 | 10 |
| nsp12 A3 | C15540T              | Ts | V700  | Syn     |    |               | 0  | 1  | 0  |
| nsp12 A3 | A15541G              | Ts | T701A | Non-syn | 1  | neutral (-27) | 10 | 10 | 9  |
| nsp12 A3 | A15547G              | Ts | N703D | Non-syn | 2  | effect (39)   | 1  | 0  | 0  |
| nsp12 A3 | T15551C              | Ts | V704A | Non-syn | 0  | effect (4)    | 1  | 0  | 0  |
| nsp12 A3 | A15554G              | Ts | N705S | Non-syn | 1  | neutral (-71) | 3  | 0  | 2  |
| nsp12 A3 | T15555C              | Ts | N705  | Syn     |    |               | 2  | 0  | 0  |
| nsp12 A3 | A15558G              | Ts | A706  | Syn     |    |               | 8  | 5  | 5  |
| nsp12 A3 | T15560C              | Ts | L707P | Non-syn | -3 | effect (86)   | 10 | 10 | 10 |
| nsp12 A3 | T15562C              | Ts | L708  | Syn     |    |               | 2  | 0  | 0  |
| nsp12 A3 | T15565C              | Ts | S709P | Non-syn | 1  | effect (39)   | 9  | 8  | 7  |
| nsp12 A3 | T15567C              | Ts | S709  | Syn     |    |               | 1  | 0  | 0  |
| nsp12 A3 | T15570C              | Ts | T710  | Syn     |    |               | 2  | 0  | 0  |
| nsp12 A3 | G15571A              | Ts | D711H | Non-syn | 1  | neutral (-56) | 1  | 0  | 0  |
| nsp12 A3 | A15572G              | Ts | D711G | Non-syn | 1  | neutral (-55) | 9  | 10 | 6  |
| nsp12 A3 | T15576C              | Ts | G712  | Syn     |    |               | 1  | 0  | 1  |
| nsp12 A3 | A15578G              | Ts | N713S | Non-syn | 1  | neutral (-85) | 9  | 10 | 9  |
| nsp12 A3 | A15581G              | Ts | K714R | Non-syn | 3  | neutral (-81) | 1  | 0  | 0  |
| nsp12 A3 | A15582G              | Ts | K714  | Syn     |    |               | 0  | 0  | 1  |
| nsp12 A3 | A15583G              | Ts | I715V | Non-syn | 4  | neutral (-85) | 5  | 3  | 3  |
| nsp12 A3 | A15593G              | Ts | K718R | Non-syn | 3  | neutral (-88) | 8  | 5  | 4  |

|             |                      |    |       |         |    |               |    |    |    |
|-------------|----------------------|----|-------|---------|----|---------------|----|----|----|
| nsp12 A3    | A15596G              | Ts | Y719C | Non-syn | 0  | neutral (-6)  | 1  | 0  | 0  |
| nsp12 A3    | T15599C              | Ts | V720A | Non-syn | 0  | neutral (-13) | 10 | 6  | 8  |
| nsp12 A3    | A15611G              | Ts | Q724R | Non-syn | 1  | effect (20)   | 4  | 0  | 1  |
| nsp12 A3    | A15612G              | Ts | Q724  | Syn     |    |               | 10 | 10 | 10 |
| nsp12 A3    | C15613T              | Ts | H725Y | Non-syn | 0  | neutral (-79) | 1  | 0  | 0  |
| nsp12 A3    | A15614G              | Ts | H725R | Non-syn | 2  | neutral (-89) | 10 | 10 | 9  |
| nsp12 A3    | A15616G              | Ts | R726G | Non-syn | -3 | neutral (-53) | 5  | 1  | 2  |
| nsp12 A3    | A15618G              | Ts | R726  | Syn     |    |               | 10 | 10 | 10 |
| nsp12 A3    | T15620C              | Ts | L727P | Non-syn | -3 | effect (66)   | 8  | 9  | 9  |
| nsp12 A3    | T15622C              | Ts | Y728H | Non-syn | 0  | effect (47)   | 1  | 0  | 0  |
| nsp12 A3    | A15626G              | Ts | E729G | Non-syn | 0  | neutral (-16) | 10 | 10 | 10 |
| nsp12 A3    | T15628C              | Ts | C730R | Non-syn | -4 | neutral (-22) | 7  | 1  | 1  |
| nsp12 A3    | T15630C              | Ts | C730  | Syn     |    |               | 9  | 8  | 9  |
| nsp12 A3    | T15632C              | Ts | L731P | Non-syn | -3 | effect (67)   | 7  | 8  | 7  |
| nsp12 A3    | A15637G <sup>h</sup> | Ts | R733G | Non-syn | -3 | effect (73)   | 2  | 1  | 1  |
| nsp12 A3    | A15641G              | Ts | N734S | Non-syn | 1  | neutral (-96) | 1  | 0  | 0  |
| nsp12 A3    | A15645G              | Ts | R735  | Syn     |    |               | 10 | 10 | 10 |
| nsp12 A3    | A15647G              | Ts | D736G | Non-syn | 1  | neutral (-52) | 9  | 10 | 10 |
| nsp12 A3    | T15650C              | Ts | V737A | Non-syn | 0  | neutral (-73) | 2  | 0  | 1  |
| nsp12 A3    | T15651C              | Ts | V737  | Syn     |    |               | 4  | 1  | 1  |
| nsp12 A3    | A15653G              | Ts | D738G | Non-syn | 1  | effect (36)   | 10 | 10 | 10 |
| nsp12 A3    | A15655G              | Ts | T739A | Non-syn | 1  | neutral (-86) | 10 | 10 | 10 |
| nsp12 A3    | C15656T              | Ts | T739I | Non-syn | 0  | neutral (-69) | 0  | 0  | 1  |
| nsp12 A3    | A15657G              | Ts | T739  | Syn     |    |               | 2  | 1  | 3  |
| nsp12 A3    | A15659G              | Ts | D740G | Non-syn | 1  | neutral (-27) | 10 | 10 | 9  |
| nsp12 A3    | T15661C              | Ts | F741L | Non-syn | 2  | neutral (-54) | 6  | 1  | 5  |
| nsp12 A3    | T15662C              | Ts | F741S | Non-syn | -3 | effect (9)    | 1  | 0  | 0  |
| nsp12 A3    | T15665C              | Ts | V742A | Non-syn | 0  | neutral (-13) | 1  | 0  | 0  |
| nsp12 A3    | A15667G              | Ts | N743D | Non-syn | 2  | neutral (-85) | 10 | 10 | 10 |
| nsp12 A4    | T15669C              | Ts | N743  | Syn     |    |               | 9  | 9  | 10 |
| nsp12 A3    | A15671G              | Ts | E744G | Non-syn | 0  | neutral (-33) | 9  | 8  | 10 |
| nsp12 A3/A4 | T15673C              | Ts | F745L | Non-syn | 2  | effect (23)   | 10 | 10 | 10 |
| nsp12 A3    | A15681G              | Ts | A747  | Syn     |    |               | 6  | 7  | 6  |
| nsp12 A4    | T15685C              | Ts | L749  | Syn     |    |               | 3  | 1  | 1  |
| nsp12 A4    | T15686C              | Ts | L749S | Non-syn | -3 | effect (50)   | 1  | 0  | 0  |
| nsp12 A4    | T15690C              | Ts | R750  | Syn     |    |               | 2  | 0  | 0  |
| nsp12 A3    | A15692G              | Ts | K751R | Non-syn | 3  | effect (39)   | 3  | 9  | 5  |
| nsp12 A4    | T15696C              | Ts | H752  | Syn     |    |               | 6  | 5  | 5  |
| nsp12 A4    | T15698C              | Ts | F753S | Non-syn | -3 | effect (60)   | 0  | 0  | 1  |
| nsp12 A4    | T15700C              | Ts | S754P | Non-syn | 1  | effect (6)    | 10 | 10 | 10 |
| nsp12 A4    | T15704C              | Ts | M755T | Non-syn | -1 | effect (73)   | 2  | 1  | 0  |

|          |                      |    |       |         |    |               |    |    |    |
|----------|----------------------|----|-------|---------|----|---------------|----|----|----|
| nsp12 A4 | A15706G              | Ts | M756V | Non-syn | 2  | neutral (-15) | 1  | 0  | 1  |
| nsp12 A4 | T15707C              | Ts | M756T | Non-syn | -1 | effect (68)   | 4  | 2  | 3  |
| nsp12 A4 | A15709G              | Ts | I757V | Non-syn | 4  | neutral (-29) | 5  | 1  | 3  |
| nsp12 A4 | A15711G              | Ts | I757M | Non-syn | 2  | effect (10)   | 1  | 0  | 0  |
| nsp12 A4 | C15712T              | Ts | L758F | Non-syn | 2  | neutral (-43) | 1  | 0  | 0  |
| nsp12 A4 | T15713C              | Ts | L758P | Non-syn | -3 | effect (46)   | 10 | 10 | 10 |
| nsp12 A4 | T15715C              | Ts | S759P | Non-syn | 1  | effect (35)   | 9  | 10 | 10 |
| nsp12 A4 | T15717C              | Ts | S759  | Syn     |    |               | 6  | 3  | 4  |
| nsp12 A4 | T15717A              | Tv | S759  | Syn     |    |               | 1  | 0  | 0  |
| nsp12 A4 | A15719G <sup>h</sup> | Ts | D760G | Non-syn | 1  | effect (55)   | 7  | 3  | 8  |
| nsp12 A4 | G15721A <sup>h</sup> | Ts | D761N | Non-syn | 2  | effect (11)   | 1  | 0  | 0  |
| nsp12 A4 | T15723C              | Ts | D761  | Syn     |    |               | 1  | 1  | 1  |
| nsp12 A4 | T15726C              | Ts | A762  | Syn     |    |               | 10 | 10 | 10 |
| nsp12 A4 | T15728C              | Ts | V763A | Non-syn | 0  | effect (10)   | 10 | 10 | 10 |
| nsp12 A4 | T15729C              | Ts | V763  | Syn     |    |               | 7  | 7  | 7  |
| nsp12 A4 | T15731C              | Ts | V764A | Non-syn | 0  | neutral (-50) | 10 | 10 | 10 |
| nsp12 A4 | T15733C              | Ts | C765R | Non-syn | -4 | effect (76)   | 10 | 10 | 10 |
| nsp12 A4 | T15735C              | Ts | C765  | Syn     |    |               | 10 | 10 | 10 |
| nsp12 A4 | T15736C              | Ts | F766L | Non-syn | 2  | neutral (-59) | 1  | 0  | 0  |
| nsp12 A4 | T15737C              | Ts | F766S | Non-syn | -3 | effect (37)   | 3  | 0  | 1  |
| nsp12 A4 | C15738T              | Ts | F766  | Syn     |    |               | 1  | 0  | 0  |
| nsp12 A4 | T15741C              | Ts | N767  | Syn     |    |               | 0  | 0  | 1  |
| nsp12 A4 | T15747C              | Ts | T769  | Syn     |    |               | 3  | 1  | 0  |
| nsp12 A4 | T15750C              | Ts | Y770  | Syn     |    |               | 5  | 6  | 7  |
| nsp12 A4 | A15753G              | Ts | A771  | Syn     |    |               | 1  | 0  | 1  |
| nsp12 A4 | T15754C              | Ts | S772P | Non-syn | 1  | neutral (-88) | 10 | 10 | 10 |
| nsp12 A4 | T15756C              | Ts | S772  | Syn     |    |               | 7  | 1  | 9  |
| nsp12 A4 | T15762C              | Ts | G774  | Syn     |    |               | 10 | 10 | 10 |
| nsp12 A4 | T15764C              | Ts | L775P | Non-syn | -3 | effect (29)   | 10 | 9  | 8  |
| nsp12 A4 | T15767C              | Ts | V776A | Non-syn | 0  | neutral (-41) | 8  | 8  | 7  |
| nsp12 A4 | T15771C              | Ts | A777  | Syn     |    |               | 10 | 9  | 8  |
| nsp12 A4 | A15772G              | Ts | S778G | Non-syn | 1  | neutral (-28) | 1  | 0  | 1  |
| nsp12 A4 | A15779G              | Ts | K780R | Non-syn | 3  | neutral (-15) | 1  | 0  | 0  |
| nsp12 A4 | A15782G              | Ts | N781S | Non-syn | 1  | neutral (-58) | 6  | 2  | 4  |
| nsp12 A4 | T15784C              | Ts | F782L | Non-syn | 2  | effect (57)   | 9  | 9  | 9  |
| nsp12 A4 | A15788G              | Ts | K783R | Non-syn | 3  | neutral (-85) | 3  | 1  | 3  |
| nsp12 A4 | T15790C              | Ts | S784P | Non-syn | 1  | neutral (-66) | 9  | 10 | 8  |
| nsp12 A4 | A15792G              | Ts | S784  | Syn     |    |               | 2  | 1  | 0  |
| nsp12 A4 | T15794C              | Ts | V785A | Non-syn | 0  | neutral (-73) | 10 | 10 | 10 |
| nsp12 A4 | T15795C              | Ts | V785  | Syn     |    |               | 7  | 6  | 7  |
| nsp12 A4 | T15797C              | Ts | L786P | Non-syn | -3 | effect (67)   | 2  | 0  | 2  |

|          |         |    |       |         |    |               |    |    |    |
|----------|---------|----|-------|---------|----|---------------|----|----|----|
| nsp12 A4 | T15802C | Ts | Y788H | Non-syn | 0  | effect (72)   | 1  | 0  | 0  |
| nsp12 A4 | T15804C | Ts | Y788  | Syn     |    |               | 5  | 1  | 1  |
| nsp12 A4 | A15808G | Ts | N790D | Non-syn | 2  | neutral (-3)  | 1  | 0  | 0  |
| nsp12 A4 | A15809G | Ts | N790S | Non-syn | 1  | neutral (-19) | 5  | 3  | 8  |
| nsp12 A4 | T15815C | Ts | V792A | Non-syn | 0  | effect (48)   | 4  | 1  | 2  |
| nsp12 A4 | T15816C | Ts | V792  | Syn     |    |               | 4  | 0  | 1  |
| nsp12 A4 | T15821C | Ts | M794T | Non-syn | -1 | neutral (-22) | 0  | 3  | 2  |
| nsp12 A4 | G15822T | Tv | M794I | Non-syn | 2  | neutral (0)   | 0  | 0  | 1  |
| nsp12 A4 | T15823C | Ts | S795P | Non-syn | 1  | neutral (-19) | 10 | 10 | 10 |
| nsp12 A4 | T15825C | Ts | S795  | Syn     |    |               | 0  | 0  | 1  |
| nsp12 A4 | A15827G | Ts | E796G | Non-syn | 0  | effect (29)   | 8  | 4  | 6  |
| nsp12 A4 | A15828G | Ts | E796  | Syn     |    |               | 10 | 9  | 9  |
| nsp12 A4 | A15831G | Ts | A797  | Syn     |    |               | 2  | 1  | 1  |
| nsp12 A4 | A15833G | Ts | K798R | Non-syn | 3  | neutral (-7)  | 9  | 9  | 7  |
| nsp12 A4 | A15834G | Ts | K798  | Syn     |    |               | 4  | 4  | 5  |
| nsp12 A4 | T15837C | Ts | C799  | Syn     |    |               | 3  | 0  | 2  |
| nsp12 A4 | T15838C | Ts | W800R | Non-syn | 2  | effect (57)   | 1  | 0  | 1  |
| nsp12 A4 | G15839A | Ts | W800* | Non-syn |    | effect (41)   | 1  | 0  | 0  |
| nsp12 A4 | A15841G | Ts | T801A | Non-syn | 1  | neutral (-45) | 10 | 10 | 10 |
| nsp12 A4 | T15843C | Ts | T801  | Syn     |    |               | 3  | 1  | 4  |
| nsp12 A4 | G15844A | Ts | E802K | Non-syn | 0  | effect (27)   | 1  | 0  | 0  |
| nsp12 A4 | A15845G | Ts | E802G | Non-syn | 0  | effect (22)   | 9  | 10 | 10 |
| nsp12 A4 | A15847G | Ts | T803A | Non-syn | 1  | neutral (-81) | 10 | 10 | 10 |
| nsp12 A4 | T15849C | Ts | T803  | Syn     |    |               | 2  | 2  | 2  |
| nsp12 A4 | A15851G | Ts | D804G | Non-syn | 1  | effect (21)   | 10 | 10 | 10 |
| nsp12 A4 | T15854C | Ts | L805P | Non-syn | -3 | effect (59)   | 7  | 7  | 8  |
| nsp12 A4 | A15860G | Ts | K807R | Non-syn | 3  | neutral (-91) | 2  | 0  | 0  |
| nsp12 A4 | A15861G | Ts | K807  | Syn     |    |               | 10 | 10 | 10 |
| nsp12 A4 | A15864G | Ts | G808  | Syn     |    |               | 9  | 9  | 8  |
| nsp12 A4 | T15867C | Ts | P809  | Syn     |    |               | 10 | 10 | 10 |
| nsp12 A4 | C15868T | Ts | H810Y | Non-syn | 0  | effect (52)   | 0  | 0  | 1  |
| nsp12 A4 | A15869G | Ts | H810R | Non-syn | 2  | effect (62)   | 2  | 0  | 0  |
| nsp12 A4 | T15870C | Ts | H810  | Syn     |    |               | 6  | 2  | 3  |
| nsp12 A4 | T15880C | Ts | S814P | Non-syn | 1  | effect (27)   | 10 | 10 | 10 |
| nsp12 A4 | T15882C | Ts | S814  | Syn     |    |               | 10 | 10 | 10 |
| nsp12 A4 | A15884G | Ts | Q815R | Non-syn | 1  | effect (34)   | 2  | 0  | 0  |
| nsp12 A4 | A15885G | Ts | Q815  | Syn     |    |               | 8  | 8  | 7  |
| nsp12 A4 | A15887G | Ts | H816R | Non-syn | 2  | neutral (-28) | 4  | 5  | 5  |
| nsp12 A4 | A15891G | Ts | T817  | Syn     |    |               | 8  | 5  | 5  |
| nsp12 A4 | A15892G | Ts | M818V | Non-syn | 2  | neutral (-85) | 10 | 10 | 10 |
| nsp12 A4 | T15896C | Ts | L819P | Non-syn | -3 | effect (62)   | 1  | 0  | 0  |



|          |                      |    |       |         |    |               |    |    |    |
|----------|----------------------|----|-------|---------|----|---------------|----|----|----|
| nsp12 A4 | A15897G              | Ts | L819  | Syn     |    |               | 4  | 0  | 1  |
| nsp12 A4 | T15899C              | Ts | V820A | Non-syn | 0  | neutral (-54) | 1  | 0  | 1  |
| nsp12 A4 | A15903G              | Ts | K821  | Syn     |    |               | 5  | 3  | 4  |
| nsp12 A4 | A15905G              | Ts | Q822R | Non-syn | 1  | neutral (-81) | 8  | 4  | 6  |
| nsp12 A4 | G15906T <sup>i</sup> | Tv | Q822H | Non-syn | 3  | neutral (-85) | 0  | 0  | 1  |
| nsp12 A4 | T15909C              | Ts | G823  | Syn     |    |               | 3  | 2  | 4  |
| nsp12 A4 | G15910A              | Ts | D824N | Non-syn | 2  | neutral (-12) | 1  | 0  | 0  |
| nsp12 A4 | A15911G              | Ts | D824G | Non-syn | 1  | neutral (-50) | 7  | 3  | 5  |
| nsp12 A4 | A15914G              | Ts | D825G | Non-syn | 1  | neutral (-69) | 1  | 0  | 0  |
| nsp12 A4 | T15915C              | Ts | D825  | Syn     |    |               | 1  | 0  | 0  |
| nsp12 A4 | T15920C              | Ts | V827A | Non-syn | 0  | neutral (-53) | 10 | 9  | 10 |
| nsp12 A4 | T15922C              | Ts | Y828H | Non-syn | 0  | effect (58)   | 1  | 0  | 0  |
| nsp12 A4 | T15926C              | Ts | L829P | Non-syn | -3 | effect (80)   | 10 | 10 | 10 |
| nsp12 A4 | T15930C              | Ts | P830  | Syn     |    |               | 5  | 3  | 5  |
| nsp12 A4 | A15936G              | Ts | P832  | Syn     |    |               | 4  | 1  | 2  |
| nsp12 A4 | A15938G <sup>h</sup> | Ts | D833G | Non-syn | 1  | effect (67)   | 8  | 7  | 9  |
| nsp12 A4 | T15939C              | Ts | D833  | Syn     |    |               | 9  | 8  | 8  |
| nsp12 A4 | A15942G              | Ts | P834  | Syn     |    |               | 2  | 1  | 0  |
| nsp12 A4 | T15943C              | Ts | S835P | Non-syn | 1  | effect (10)   | 2  | 0  | 2  |
| nsp12 A4 | C15944T              | Ts | S835L | Non-syn | -3 | neutral (0)   | 2  | 0  | 0  |
| nsp12 A4 | A15945G              | Ts | S835  | Syn     |    |               | 2  | 2  | 1  |
| nsp12 A4 | A15946G              | Ts | R836G | Non-syn | -3 | effect (88)   | 4  | 1  | 1  |
| nsp12 A4 | A15948G              | Ts | R836  | Syn     |    |               | 8  | 8  | 10 |
| nsp12 A4 | A15949G              | Ts | I837V | Non-syn | 4  | neutral (-63) | 8  | 9  | 5  |
| nsp12 A4 | A15954G              | Ts | L838  | Syn     |    |               | 4  | 3  | 3  |
| nsp12 A4 | T15964C <sup>h</sup> | Ts | C842R | Non-syn | -4 | effect (59)   | 1  | 0  | 0  |
| nsp12 A4 | T15966C              | Ts | C842  | Syn     |    |               | 6  | 6  | 5  |
| nsp12 A4 | T15968C              | Ts | F843S | Non-syn | -3 | neutral (-24) | 1  | 1  | 0  |
| nsp12 A4 | T15971C              | Ts | V844A | Non-syn | 0  | effect (10)   | 1  | 0  | 0  |
| nsp12 A4 | A15972G              | Ts | V844  | Syn     |    |               | 0  | 1  | 1  |
| nsp12 A4 | A15977G              | Ts | D846G | Non-syn | 1  | effect (57)   | 7  | 7  | 5  |
| nsp12 A4 | A15979G              | Ts | I847V | Non-syn | 4  | neutral (-93) | 1  | 0  | 0  |
| nsp12 A4 | T15980C              | Ts | I847T | Non-syn | 0  | neutral (-67) | 1  | 1  | 0  |
| nsp12 A4 | A15987G              | Ts | K849  | Syn     |    |               | 7  | 9  | 6  |
| nsp12 A4 | A15988G              | Ts | T850A | Non-syn | 1  | neutral (-69) | 4  | 6  | 2  |
| nsp12 A4 | A15992G <sup>h</sup> | Ts | D851G | Non-syn | 1  | effect (60)   | 10 | 10 | 10 |
| nsp12 A4 | T15996C              | Ts | G852  | Syn     |    |               | 1  | 0  | 0  |
| nsp12 A4 | A15997G              | Ts | T853A | Non-syn | 1  | neutral (-29) | 3  | 1  | 1  |
| nsp12 A4 | A15999G              | Ts | T853  | Syn     |    |               | 10 | 9  | 10 |
| nsp12 A4 | T16001C              | Ts | L854P | Non-syn | -3 | neutral (-43) | 1  | 0  | 1  |
| nsp12 A4 | A16006G              | Ts | I856V | Non-syn | 4  | neutral (-86) | 10 | 10 | 10 |

|          |         |    |       |         |    |               |   |    |   |
|----------|---------|----|-------|---------|----|---------------|---|----|---|
| nsp12 A4 | A16010G | Ts | E857G | Non-syn | 0  | effect (40)   | 9 | 8  | 9 |
| nsp12 A4 | A16011G | Ts | E857  | Syn     |    |               | 0 | 0  | 1 |
| nsp12 A4 | T16015C | Ts | F859L | Non-syn | 2  | neutral (-74) | 7 | 8  | 9 |
| nsp12 A4 | T16016C | Ts | F859S | Non-syn | -3 | effect (1)    | 3 | 1  | 2 |
| nsp12 A4 | T16019C | Ts | V860A | Non-syn | 0  | neutral (-37) | 3 | 1  | 1 |
| nsp12 A4 | T16021C | Ts | S861P | Non-syn | 1  | effect (73)   | 6 | 4  | 4 |
| nsp12 A4 | T16023C | Ts | S861  | Syn     |    |               | 4 | 0  | 2 |
| nsp12 A4 | A16026G | Ts | L862  | Syn     |    |               | 1 | 1  | 0 |
| nsp12 A4 | C16028T | Ts | A863V | Non-syn | 0  | effect (11)   | 1 | 0  | 0 |
| nsp12 A4 | A16030G | Ts | I864V | Non-syn | 4  | neutral (-51) | 2 | 1  | 0 |
| nsp12 A4 | A16034G | Ts | D865G | Non-syn | 1  | effect (81)   | 8 | 7  | 8 |
| nsp12 A4 | T16038C | Ts | A866  | Syn     |    |               | 1 | 0  | 0 |
| nsp12 A4 | A16044G | Ts | P868  | Syn     |    |               | 2 | 1  | 2 |
| nsp12 A4 | T16047C | Ts | L869  | Syn     |    |               | 1 | 0  | 0 |
| nsp12 A4 | C16049T | Ts | T870I | Non-syn | 0  | neutral (-81) | 0 | 0  | 1 |
| nsp12 A4 | A16052G | Ts | K871R | Non-syn | 3  | neutral (-86) | 1 | 0  | 0 |
| nsp12 A4 | A16053G | Ts | K871  | Syn     |    |               | 8 | 9  | 8 |
| spike A5 | T22873C | Ts | N437  | Syn     |    |               | 7 | 10 | 8 |
| spike A5 | T22874C | Ts | S438P | Non-syn | 1  | neutral (-50) | 8 | 10 | 9 |
| spike A5 | T22876C | Ts | S438  | Syn     |    |               | 8 | 10 | 9 |
| spike A5 | T22882C | Ts | N440  | Syn     |    |               | 7 | 8  | 8 |
| spike A5 | T22884C | Ts | L441P | Non-syn | -3 | effect (53)   | 4 | 7  | 4 |
| spike A5 | T22885C | Ts | L441  | Syn     |    |               | 0 | 1  | 0 |
| spike A5 | T22888C | Ts | D442  | Syn     |    |               | 8 | 10 | 8 |
| spike A5 | T22889C | Ts | S443P | Non-syn | 1  | neutral (-9)  | 4 | 2  | 3 |
| spike A5 | A22893G | Ts | K444R | Non-syn | 3  | neutral (-58) | 1 | 0  | 0 |
| spike A5 | T22896C | Ts | V445A | Non-syn | 0  | neutral (-50) | 6 | 7  | 3 |
| spike A5 | T22897C | Ts | V445  | Syn     |    |               | 0 | 2  | 0 |
| spike A5 | T22900C | Ts | G446  | Syn     |    |               | 5 | 2  | 2 |
| spike A5 | T22917C | Ts | L452P | Non-syn | -3 | neutral (-16) | 8 | 10 | 8 |
| spike A5 | T22928C | Ts | F456L | Non-syn | 2  | neutral (-67) | 3 | 3  | 1 |
| spike A5 | T22929C | Ts | F456S | Non-syn | -3 | neutral (-32) | 3 | 2  | 1 |
| spike A5 | A22934G | Ts | K458E | Non-syn | 0  | neutral (-31) | 0 | 2  | 2 |
| spike A5 | A22935G | Ts | K458R | Non-syn | 3  | neutral (-76) | 8 | 10 | 9 |
| spike A5 | T22937C | Ts | S459P | Non-syn | 1  | neutral (-28) | 8 | 10 | 8 |
| spike A5 | T22939C | Ts | S459  | Syn     |    |               | 0 | 1  | 1 |
| spike A5 | T22942C | Ts | N460  | Syn     |    |               | 8 | 10 | 9 |
| spike A5 | T22944C | Ts | L461P | Non-syn | -3 | effect (76)   | 8 | 10 | 9 |
| spike A5 | A22946G | Ts | K462E | Non-syn | 0  | effect (62)   | 0 | 1  | 0 |
| spike A5 | A22948G | Ts | K462  | Syn     |    |               | 6 | 6  | 6 |
| spike A5 | T22951C | Ts | P463  | Syn     |    |               | 8 | 10 | 9 |

|          |                      |    |       |         |    |               |   |    |   |
|----------|----------------------|----|-------|---------|----|---------------|---|----|---|
| spike A5 | T22952C              | Ts | F464L | Non-syn | 2  | neutral (-59) | 1 | 0  | 0 |
| spike A5 | A22956G              | Ts | E465G | Non-syn | 0  | neutral (-36) | 8 | 10 | 9 |
| spike A5 | A22958G              | Ts | R466G | Non-syn | -3 | effect (11)   | 8 | 10 | 9 |
| spike A5 | A22960G              | Ts | R466  | Syn     |    |               | 8 | 10 | 9 |
| spike A5 | A22962G              | Ts | D467G | Non-syn | 1  | neutral (-14) | 8 | 10 | 9 |
| spike A5 | A22964G              | Ts | I468V | Non-syn | 4  | neutral (-88) | 0 | 1  | 0 |
| spike A5 | T22965C              | Ts | I468T | Non-syn | 0  | neutral (-23) | 1 | 0  | 0 |
| spike A5 | T22967C              | Ts | S469P | Non-syn | 1  | neutral (-48) | 1 | 1  | 0 |
| spike A5 | A22976G              | Ts | I472V | Non-syn | 4  | neutral (-95) | 4 | 5  | 0 |
| spike A5 | T22977C              | Ts | I472T | Non-syn | 0  | neutral (-70) | 3 | 2  | 0 |
| spike A5 | T22981C              | Ts | Y473  | Syn     |    |               | 0 | 1  | 0 |
| spike A5 | A22983G              | Ts | Q474R | Non-syn | 1  | neutral (-60) | 3 | 5  | 6 |
| spike A5 | C22986T              | Ts | A475V | Non-syn | 0  | neutral (-88) | 1 | 0  | 0 |
| spike A5 | T22990C              | Ts | G476  | Syn     |    |               | 4 | 4  | 1 |
| spike A5 | A22991G              | Ts | S477G | Non-syn | 1  | neutral (-60) | 0 | 0  | 1 |
| spike A5 | A22994G              | Ts | T478A | Non-syn | 1  | neutral (-73) | 5 | 5  | 3 |
| spike A5 | A22996G              | Ts | T478  | Syn     |    |               | 6 | 5  | 5 |
| spike A5 | C22997T              | Ts | P479S | Non-syn | 1  | neutral (-16) | 1 | 0  | 0 |
| spike A5 | T22999C              | Ts | P479  | Syn     |    |               | 7 | 9  | 8 |
| spike A5 | A23004G              | Ts | N481S | Non-syn | 1  | neutral (-90) | 2 | 1  | 1 |
| spike A5 | T23005C              | Ts | N481  | Syn     |    |               | 2 | 2  | 0 |
| spike A5 | T23008C              | Ts | G482  | Syn     |    |               | 7 | 6  | 5 |
| spike A5 | T23010C              | Ts | V483A | Non-syn | 0  | neutral (-69) | 8 | 8  | 9 |
| spike A5 | T23011C              | Ts | V483  | Syn     |    |               | 1 | 1  | 0 |
| spike A5 | A23014G              | Ts | E484  | Syn     |    |               | 8 | 7  | 8 |
| spike A5 | T23017C              | Ts | G485  | Syn     |    |               | 8 | 10 | 9 |
| spike A5 | T23026C              | Ts | C488  | Syn     |    |               | 8 | 9  | 8 |
| spike A5 | T23030C              | Ts | F490L | Non-syn | 2  | neutral (-59) | 8 | 10 | 9 |
| spike A5 | T23032C              | Ts | F490  | Syn     |    |               | 7 | 6  | 8 |
| spike A5 | T23035C              | Ts | P491  | Syn     |    |               | 7 | 6  | 7 |
| spike A5 | T23036C              | Ts | L492  | Syn     |    |               | 4 | 2  | 3 |
| spike A5 | A23041G              | Ts | Q493  | Syn     |    |               | 2 | 2  | 1 |
| spike A5 | T23042C <sup>i</sup> | Ts | S494P | Non-syn | 1  | neutral (-25) | 3 | 3  | 0 |
| spike A5 | A23046G              | Ts | Y495C | Non-syn | 0  | effect (4)    | 0 | 0  | 1 |
| spike A5 | T23047C              | Ts | Y495  | Syn     |    |               | 2 | 1  | 0 |
| spike A5 | T23050C              | Ts | G496  | Syn     |    |               | 7 | 10 | 9 |
| spike A5 | T23051C              | Ts | F497L | Non-syn | 2  | neutral (-79) | 3 | 3  | 0 |
| spike A5 | T23052C              | Ts | F497S | Non-syn | -3 | effect (4)    | 1 | 1  | 0 |
| spike A5 | A23055G              | Ts | Q498R | Non-syn | 1  | neutral (-52) | 1 | 1  | 0 |
| spike A5 | A23056G              | Ts | Q498  | Syn     |    |               | 8 | 5  | 6 |
| spike A5 | C23061T              | Ts | T500I | Non-syn | 0  | neutral (-6)  | 1 | 0  | 0 |

|          |          |    |       |         |    |               |   |    |   |
|----------|----------|----|-------|---------|----|---------------|---|----|---|
| spike A5 | T23065C  | Ts | N501  | Syn     |    |               | 1 | 0  | 0 |
| spike A5 | T23068C  | Ts | G502  | Syn     |    |               | 6 | 5  | 7 |
| spike A5 | T23070C  | Ts | V503A | Non-syn | 0  | neutral (-55) | 7 | 9  | 7 |
| spike A5 | T23074C  | Ts | G504  | Syn     |    |               | 5 | 6  | 6 |
| spike A5 | A23076G  | Ts | Y505C | Non-syn | 0  | effect (6)    | 0 | 1  | 0 |
| spike A5 | A23079G  | Ts | Q506R | Non-syn | 1  | effect (21)   | 3 | 2  | 1 |
| spike A5 | A23080G  | Ts | Q506  | Syn     |    |               | 4 | 2  | 2 |
| spike A5 | A23087G  | Ts | R509G | Non-syn | -3 | neutral (-32) | 5 | 7  | 5 |
| spike A5 | A23089G  | Ts | R509  | Syn     |    |               | 8 | 10 | 9 |
| spike A5 | A23095G  | Ts | V511  | Syn     |    |               | 1 | 0  | 0 |
| spike A5 | T23100C  | Ts | L513P | Non-syn | -3 | effect (73)   | 8 | 10 | 9 |
| spike A5 | T23102C  | Ts | S514P | Non-syn | 1  | effect (9)    | 5 | 6  | 8 |
| spike A5 | T23104C  | Ts | S514  | Syn     |    |               | 8 | 10 | 9 |
| spike A5 | A23109G  | Ts | E516G | Non-syn | 0  | neutral (-49) | 5 | 2  | 1 |
| spike A5 | A23110G  | Ts | E516  | Syn     |    |               | 6 | 4  | 6 |
| spike A5 | T23112C  | Ts | L517P | Non-syn | -3 | effect (11)   | 8 | 10 | 9 |
| spike A5 | A23116G  | Ts | L518  | Syn     |    |               | 4 | 1  | 0 |
| spike A5 | A23118G  | Ts | H519R | Non-syn | 2  | neutral (-48) | 5 | 3  | 4 |
| spike A5 | A23122G  | Ts | A520  | Syn     |    |               | 8 | 10 | 9 |
| spike A5 | A23125G  | Ts | P521  | Syn     |    |               | 4 | 2  | 3 |
| spike A5 | C23127Ti | Ts | A522V | Non-syn | 0  | neutral (-71) | 0 | 0  | 1 |
| spike A5 | A23129G  | Ts | T523A | Non-syn | 1  | neutral (-45) | 8 | 8  | 8 |
| spike A5 | T23131C  | Ts | T523  | Syn     |    |               | 0 | 1  | 0 |
| spike A5 | T23133C  | Ts | V524A | Non-syn | 0  | effect (41)   | 5 | 7  | 8 |
| spike A5 | T23134C  | Ts | V524  | Syn     |    |               | 1 | 0  | 0 |
| spike A5 | T23137C  | Ts | C525  | Syn     |    |               | 1 | 0  | 2 |
| spike A5 | A23140G  | Ts | G526  | Syn     |    |               | 8 | 10 | 9 |
| spike A5 | A23148G  | Ts | K529R | Non-syn | 3  | neutral (-71) | 2 | 2  | 2 |
| spike A5 | T23150C  | Ts | S530P | Non-syn | 1  | neutral (-36) | 8 | 10 | 9 |
| spike A5 | T23152C  | Ts | S530  | Syn     |    |               | 2 | 0  | 1 |
| spike A5 | A23153G  | Ts | T531A | Non-syn | 1  | neutral (-63) | 0 | 0  | 1 |
| spike A5 | T23159C  | Ts | L533  | Syn     |    |               | 0 | 1  | 0 |
| spike A5 | T23163C  | Ts | V534A | Non-syn | 0  | neutral (-4)  | 4 | 1  | 4 |
| spike A5 | A23168G  | Ts | N536D | Non-syn | 2  | neutral (-50) | 5 | 5  | 1 |
| spike A5 | A23169G  | Ts | N536S | Non-syn | 1  | neutral (-50) | 8 | 10 | 9 |
| spike A5 | A23172G  | Ts | K537R | Non-syn | 3  | neutral (-35) | 2 | 1  | 0 |
| spike A5 | A23173G  | Ts | K537  | Syn     |    |               | 2 | 2  | 0 |
| spike A5 | T23176C  | Ts | C538  | Syn     |    |               | 7 | 7  | 9 |
| spike A5 | T23178C  | Ts | V539A | Non-syn | 0  | effect (3)    | 8 | 10 | 9 |
| spike A5 | A23180G  | Ts | N540D | Non-syn | 2  | neutral (-68) | 0 | 1  | 0 |
| spike A5 | T23182C  | Ts | N540  | Syn     |    |               | 8 | 10 | 8 |

|             |         |    |       |         |    |               |    |    |    |
|-------------|---------|----|-------|---------|----|---------------|----|----|----|
| spike A5    | T23184C | Ts | F541S | Non-syn | -3 | effect (87)   | 0  | 1  | 0  |
| spike A5    | A23187G | Ts | N542S | Non-syn | 1  | neutral (-12) | 2  | 2  | 0  |
| spike A5    | C23188T | Ts | N542  | Syn     |    |               | 0  | 1  | 0  |
| spike A5    | T23189C | Ts | F543L | Non-syn | 2  | neutral (-61) | 3  | 4  | 3  |
| spike A5    | A23193G | Ts | N544S | Non-syn | 1  | neutral (-67) | 2  | 2  | 0  |
| spike A5    | T23197C | Ts | G545  | Syn     |    |               | 1  | 0  | 0  |
| spike A5    | A23201G | Ts | T547A | Non-syn | 1  | effect (12)   | 5  | 8  | 7  |
| spike A5    | C23202T | Ts | T547I | Non-syn | 0  | effect (72)   | 0  | 0  | 1  |
| spike A5    | A23203G | Ts | T547  | Syn     |    |               | 8  | 10 | 9  |
| spike A5    | A23207G | Ts | T549A | Non-syn | 1  | neutral (-33) | 8  | 9  | 8  |
| spike A5    | A23209G | Ts | T549  | Syn     |    |               | 8  | 7  | 7  |
| spike A5    | T23212C | Ts | G550  | Syn     |    |               | 1  | 1  | 0  |
| spike A5    | T23214C | Ts | V551A | Non-syn | 0  | effect (34)   | 8  | 9  | 9  |
| spike A5    | T23215C | Ts | V551  | Syn     |    |               | 8  | 7  | 7  |
| spike A5    | T23217C | Ts | L552P | Non-syn | -3 | effect (89)   | 2  | 0  | 1  |
| spike A5    | A23223G | Ts | E554G | Non-syn | 0  | effect (12)   | 8  | 10 | 9  |
| spike A5    | T23225C | Ts | S555P | Non-syn | 1  | effect (31)   | 7  | 9  | 7  |
| spike A5    | A23229G | Ts | N556S | Non-syn | 1  | neutral (-56) | 7  | 10 | 7  |
| spike A5    | A23233G | Ts | K557  | Syn     |    |               | 2  | 1  | 0  |
| spike A5    | A23235G | Ts | K558R | Non-syn | 3  | neutral (-86) | 0  | 1  | 0  |
| spike A5    | T23241C | Ts | L560P | Non-syn | -3 | neutral (-11) | 5  | 5  | 2  |
| spike A5    | T23245C | Ts | P561  | Syn     |    |               | 8  | 10 | 8  |
| spike A5    | T23246C | Ts | F562L | Non-syn | 2  | neutral (-12) | 4  | 3  | 4  |
| spike A5    | T23247C | Ts | F562S | Non-syn | -3 | effect (21)   | 3  | 4  | 4  |
| spike A5    | A23250G | Ts | Q563R | Non-syn | 1  | neutral (-21) | 3  | 2  | 1  |
| spike A5    | A23251G | Ts | Q563  | Syn     |    |               | 8  | 8  | 6  |
| spike A5    | A23253G | Ts | Q564R | Non-syn | 1  | effect (15)   | 0  | 1  | 0  |
| spike A5/A6 | A23261G | Ts | R567G | Non-syn | -3 | effect (47)   | 9  | 10 | 8  |
| spike A5/A6 | A23263G | Ts | R567  | Syn     |    |               | 10 | 10 | 10 |
| spike A5/A6 | A23265G | Ts | D568G | Non-syn | 1  | neutral (-5)  | 9  | 10 | 9  |
| spike A5    | A23267G | Ts | I569V | Non-syn | 4  | neutral (-76) | 3  | 2  | 0  |
| spike A6    | T23268C | Ts | I569T | Non-syn | 0  | neutral (-49) | 1  | 0  | 0  |
| spike A6    | C23271T | Ts | A570V | Non-syn | 0  | neutral (-88) | 0  | 1  | 0  |
| spike A6    | T23272C | Ts | A570  | Syn     |    |               | 9  | 9  | 9  |
| spike A6    | G23273A | Ts | D571N | Non-syn | 2  | neutral (-46) | 1  | 0  | 0  |
| spike A6    | A23274G | Ts | D571G | Non-syn | 1  | neutral (-61) | 3  | 0  | 0  |
| spike A6    | A23276G | Ts | T572A | Non-syn | 1  | neutral (-66) | 6  | 1  | 4  |
| spike A6    | T23278C | Ts | T572  | Syn     |    |               | 1  | 0  | 0  |
| spike A6    | C23280T | Ts | T573I | Non-syn | 0  | neutral (-54) | 1  | 0  | 0  |
| spike A6    | T23281C | Ts | T573  | Syn     |    |               | 4  | 1  | 4  |
| spike A6    | A23283G | Ts | D574G | Non-syn | 1  | neutral (-39) | 2  | 0  | 1  |

|          |         |    |       |         |    |               |    |    |    |
|----------|---------|----|-------|---------|----|---------------|----|----|----|
| spike A6 | T23284C | Ts | D574  | Syn     |    |               | 7  | 6  | 6  |
| spike A6 | C23286T | Ts | A575V | Non-syn | 0  | neutral (-71) | 1  | 0  | 0  |
| spike A6 | T23287C | Ts | A575  | Syn     |    |               | 9  | 8  | 10 |
| spike A6 | T23289C | Ts | V576A | Non-syn | 0  | neutral (-35) | 10 | 10 | 10 |
| spike A6 | T23293C | Ts | R577  | Syn     |    |               | 10 | 8  | 8  |
| spike A6 | A23295G | Ts | D578G | Non-syn | 1  | effect (42)   | 4  | 1  | 4  |
| spike A6 | T23296C | Ts | D578  | Syn     |    |               | 10 | 7  | 8  |
| spike A6 | A23299G | Ts | P579  | Syn     |    |               | 1  | 0  | 0  |
| spike A6 | A23301G | Ts | Q580R | Non-syn | 1  | neutral (-38) | 4  | 5  | 4  |
| spike A6 | G23302T | Tv | Q580H | Non-syn | 3  | neutral (-42) | 0  | 1  | 0  |
| spike A6 | A23303G | Ts | T581A | Non-syn | 1  | effect (42)   | 9  | 8  | 7  |
| spike A6 | A23305G | Ts | T581  | Syn     |    |               | 3  | 1  | 0  |
| spike A6 | T23307C | Ts | L582P | Non-syn | -3 | effect (28)   | 7  | 8  | 8  |
| spike A6 | T23308C | Ts | L582  | Syn     |    |               | 3  | 1  | 3  |
| spike A6 | A23310G | Ts | E583G | Non-syn | 0  | neutral (-12) | 9  | 6  | 9  |
| spike A6 | G23311T | Tv | E583D | Non-syn | 3  | neutral (-59) | 0  | 0  | 1  |
| spike A6 | A23312G | Ts | I584V | Non-syn | 4  | neutral (-95) | 1  | 2  | 2  |
| spike A6 | T23313C | Ts | I584T | Non-syn | 0  | neutral (-68) | 3  | 0  | 1  |
| spike A6 | T23314C | Ts | I584  | Syn     |    |               | 2  | 0  | 1  |
| spike A6 | T23317C | Ts | L585  | Syn     |    |               | 3  | 0  | 2  |
| spike A6 | A23319G | Ts | D586G | Non-syn | 1  | effect (5)    | 9  | 6  | 8  |
| spike A6 | A23321G | Ts | I587V | Non-syn | 4  | neutral (-74) | 1  | 0  | 0  |
| spike A6 | T23322C | Ts | I587T | Non-syn | 0  | effect (55)   | 3  | 0  | 3  |
| spike A6 | A23326G | Ts | T588  | Syn     |    |               | 9  | 8  | 7  |
| spike A6 | T23330C | Ts | C590R | Non-syn | -4 | effect (93)   | 8  | 8  | 8  |
| spike A6 | T23332C | Ts | C590  | Syn     |    |               | 10 | 10 | 10 |
| spike A6 | T23333C | Ts | S591P | Non-syn | 1  | neutral (-25) | 9  | 7  | 8  |
| spike A6 | T23335C | Ts | S591  | Syn     |    |               | 9  | 8  | 8  |
| spike A6 | T23337C | Ts | F592S | Non-syn | -3 | neutral (-68) | 3  | 0  | 0  |
| spike A6 | T23338C | Ts | F592  | Syn     |    |               | 1  | 0  | 0  |
| spike A6 | T23341C | Ts | G593  | Syn     |    |               | 6  | 2  | 5  |
| spike A6 | T23344C | Ts | G594  | Syn     |    |               | 10 | 10 | 8  |
| spike A6 | T23346C | Ts | V595A | Non-syn | 0  | effect (10)   | 10 | 10 | 10 |
| spike A6 | A23348G | Ts | S596G | Non-syn | 1  | effect (49)   | 0  | 1  | 2  |
| spike A6 | T23350C | Ts | S596  | Syn     |    |               | 10 | 10 | 10 |
| spike A6 | T23352C | Ts | V597A | Non-syn | 0  | neutral (-50) | 10 | 10 | 10 |
| spike A6 | A23357G | Ts | T599A | Non-syn | 1  | neutral (-21) | 3  | 1  | 3  |
| spike A6 | A23359G | Ts | T599  | Syn     |    |               | 7  | 5  | 1  |
| spike A6 | A23362G | Ts | P600  | Syn     |    |               | 5  | 0  | 0  |
| spike A6 | A23365G | Ts | G601  | Syn     |    |               | 0  | 0  | 1  |
| spike A6 | A23366G | Ts | T602A | Non-syn | 1  | neutral (-65) | 10 | 10 | 10 |

|          |                                               |    |       |         |    |               |    |    |    |
|----------|-----------------------------------------------|----|-------|---------|----|---------------|----|----|----|
| spike A6 | A23370G                                       | Ts | N603S | Non-syn | 1  | neutral (-20) | 1  | 1  | 1  |
| spike A6 | T23374C                                       | Ts | T604  | Syn     |    |               | 10 | 10 | 10 |
| spike A6 | A23379G                                       | Ts | N606S | Non-syn | 1  | neutral (-68) | 4  | 0  | 1  |
| spike A6 | C23380T <sup>i</sup>                          | Ts | N606  | Syn     |    |               | 1  | 2  | 0  |
| spike A6 | T23385C                                       | Ts | V608A | Non-syn | 0  | neutral (-59) | 9  | 10 | 9  |
| spike A6 | T23386C                                       | Ts | V608  | Syn     |    |               | 1  | 1  | 0  |
| spike A6 | T23389C                                       | Ts | A609  | Syn     |    |               | 8  | 8  | 6  |
| spike A6 | T23391C                                       | Ts | V610A | Non-syn | 0  | neutral (-7)  | 10 | 10 | 10 |
| spike A6 | T23392C                                       | Ts | V610  | Syn     |    |               | 6  | 5  | 8  |
| spike A6 | T23394C                                       | Ts | L611P | Non-syn | -3 | effect (85)   | 10 | 10 | 10 |
| spike A6 | T23398C                                       | Ts | Y612  | Syn     |    |               | 2  | 0  | 0  |
| spike A6 | C23399T                                       | Ts | Q613* | Non-syn |    | neutral (-57) | 1  | 0  | 0  |
| spike A6 | A23400G                                       | Ts | Q613R | Non-syn | 1  | neutral (-61) | 9  | 5  | 7  |
| spike A6 | A23403G <sup>i</sup>                          | Ts | D614G | Non-syn | 1  | neutral (-52) | 10 | 9  | 10 |
| spike A6 | A23403G <sup>i+</sup><br>T23404C <sup>j</sup> | Ts | D614G | Non-syn | 1  | neutral (-52) | 8  | 6  | 5  |
| spike A6 | T23406C                                       | Ts | V615A | Non-syn | 0  | neutral (-30) | 10 | 8  | 9  |
| spike A6 | A23409G                                       | Ts | N616S | Non-syn | 1  | neutral (-85) | 2  | 3  | 1  |
| spike A6 | T23411C                                       | Ts | C617R | Non-syn | -4 | effect (84)   | 7  | 5  | 7  |
| spike A6 | A23414G                                       | Ts | T618A | Non-syn | 1  | neutral (-60) | 10 | 10 | 9  |
| spike A6 | A23416G                                       | Ts | T618  | Syn     |    |               | 1  | 0  | 0  |
| spike A6 | A23419G                                       | Ts | E619  | Syn     |    |               | 10 | 10 | 10 |
| spike A6 | T23421C                                       | Ts | V620A | Non-syn | 0  | neutral (-12) | 10 | 10 | 10 |
| spike A6 | T23425C                                       | Ts | P621  | Syn     |    |               | 8  | 2  | 3  |
| spike A6 | G23426A                                       | Ts | V622I | Non-syn | 4  | neutral (-56) | 1  | 0  | 0  |
| spike A6 | T23427C                                       | Ts | V622A | Non-syn | 0  | neutral (-50) | 8  | 9  | 9  |
| spike A6 | T23428C                                       | Ts | V622  | Syn     |    |               | 7  | 6  | 5  |
| spike A6 | T23433C                                       | Ts | I624T | Non-syn | 0  | effect (8)    | 5  | 2  | 7  |
| spike A6 | T23434C                                       | Ts | I624  | Syn     |    |               | 5  | 4  | 4  |
| spike A6 | A23436G                                       | Ts | H625R | Non-syn | 2  | neutral (-14) | 2  | 0  | 1  |
| spike A6 | T23437C                                       | Ts | H625  | Syn     |    |               | 3  | 1  | 0  |
| spike A6 | A23440G                                       | Ts | A626  | Syn     |    |               | 10 | 10 | 10 |
| spike A6 | A23442G                                       | Ts | D627G | Non-syn | 1  | neutral (-14) | 1  | 0  | 1  |
| spike A6 | T23443C                                       | Ts | D627  | Syn     |    |               | 4  | 0  | 2  |
| spike A6 | A23445G                                       | Ts | Q628R | Non-syn | 1  | neutral (-22) | 3  | 0  | 1  |
| spike A6 | A23446G <sup>h</sup>                          | Ts | Q628G | Non-syn | -1 | neutral (0)   | 1  | 1  | 2  |
| spike A6 | T23448C                                       | Ts | L629P | Non-syn | -3 | effect (17)   | 5  | 2  | 4  |
| spike A6 | T23452C                                       | Ts | T630  | Syn     |    |               | 10 | 10 | 10 |
| spike A6 | T23455C                                       | Ts | P631  | Syn     |    |               | 1  | 0  | 0  |
| spike A6 | T23459C                                       | Ts | W633R | Non-syn | 2  | effect (75)   | 3  | 0  | 3  |
| spike A6 | T23464C                                       | Ts | R634  | Syn     |    |               | 5  | 1  | 3  |

|          |                      |    |       |         |    |               |    |    |    |
|----------|----------------------|----|-------|---------|----|---------------|----|----|----|
| spike A6 | T23466C              | Ts | V635A | Non-syn | 0  | neutral (-16) | 10 | 9  | 8  |
| spike A6 | T23467C              | Ts | V635  | Syn     |    |               | 0  | 0  | 2  |
| spike A6 | T23470C              | Ts | Y636  | Syn     |    |               | 2  | 0  | 4  |
| spike A6 | T23471C              | Ts | S637P | Non-syn | 1  | effect (44)   | 1  | 0  | 0  |
| spike A6 | A23474G              | Ts | T638A | Non-syn | 1  | effect (17)   | 1  | 0  | 1  |
| spike A6 | C23475T              | Ts | T638I | Non-syn | 0  | effect (66)   | 1  | 0  | 0  |
| spike A6 | A23476G <sup>h</sup> | Ts | T638M | Non-syn | -1 | effect (60)   | 9  | 10 | 8  |
| spike A6 | T23479C              | Ts | G639  | Syn     |    |               | 10 | 10 | 10 |
| spike A6 | T23480C              | Ts | S640P | Non-syn | 1  | neutral (-45) | 8  | 5  | 8  |
| spike A6 | C23481T              | Ts | S640F | Non-syn | -3 | neutral (-14) | 1  | 0  | 0  |
| spike A6 | T23482C              | Ts | S640  | Syn     |    |               | 1  | 0  | 1  |
| spike A6 | T23485C              | Ts | N641  | Syn     |    |               | 1  | 0  | 0  |
| spike A6 | T23487C              | Ts | V642A | Non-syn | 0  | neutral (-53) | 10 | 10 | 9  |
| spike A6 | T23489C              | Ts | F643L | Non-syn | 2  | effect (3)    | 8  | 6  | 8  |
| spike A6 | A23493G              | Ts | Q644R | Non-syn | 1  | effect (34)   | 2  | 0  | 0  |
| spike A6 | A23495G              | Ts | T645A | Non-syn | 1  | effect (52)   | 10 | 10 | 9  |
| spike A6 | A23497G              | Ts | T645  | Syn     |    |               | 7  | 8  | 5  |
| spike A6 | T23500C              | Ts | R646  | Syn     |    |               | 0  | 0  | 1  |
| spike A6 | A23503G              | Ts | A647  | Syn     |    |               | 10 | 10 | 10 |
| spike A6 | T23507C <sup>h</sup> | Ts | C649R | Non-syn | -4 | effect (91)   | 3  | 1  | 4  |
| spike A6 | T23509C              | Ts | C649  | Syn     |    |               | 2  | 0  | 2  |
| spike A6 | A23513G              | Ts | I651V | Non-syn | 4  | neutral (-86) | 1  | 0  | 0  |
| spike A6 | A23515G              | Ts | I651M | Non-syn | 2  | neutral (0)   | 2  | 1  | 2  |
| spike A6 | G23517A              | Ts | G652E | Non-syn | 0  | effect (78)   | 1  | 0  | 0  |
| spike A6 | G23519A              | Ts | A653T | Non-syn | 1  | neutral (-75) | 1  | 0  | 0  |
| spike A6 | C23520T              | Ts | A653V | Non-syn | 0  | neutral (-91) | 1  | 0  | 0  |
| spike A6 | T23521C              | Ts | A653  | Syn     |    |               | 6  | 6  | 4  |
| spike A6 | A23523G              | Ts | E654G | Non-syn | 0  | effect (44)   | 1  | 0  | 1  |
| spike A6 | A23524G              | Ts | E654  | Syn     |    |               | 10 | 10 | 10 |
| spike A6 | A23526G              | Ts | H655R | Non-syn | 2  | effect (21)   | 2  | 1  | 3  |
| spike A6 | T23527C              | Ts | H655  | Syn     |    |               | 3  | 0  | 3  |
| spike A6 | T23529C              | Ts | V656A | Non-syn | 0  | neutral (-41) | 10 | 9  | 10 |
| spike A6 | A23531G              | Ts | N657D | Non-syn | 2  | neutral (-21) | 9  | 9  | 9  |
| spike A6 | A23532G              | Ts | N657S | Non-syn | 1  | neutral (-81) | 3  | 0  | 3  |
| spike A6 | A23535G              | Ts | N658S | Non-syn | 1  | neutral (-63) | 3  | 1  | 4  |
| spike A6 | T23537C              | Ts | S659P | Non-syn | 1  | effect (23)   | 5  | 4  | 5  |
| spike A6 | A23544G              | Ts | E661G | Non-syn | 0  | effect (41)   | 9  | 5  | 9  |
| spike A6 | T23546C              | Ts | C662R | Non-syn | -4 | effect (92)   | 4  | 0  | 2  |
| spike A6 | T23548C              | Ts | C662  | Syn     |    |               | 8  | 4  | 7  |
| spike A6 | A23550G              | Ts | D663G | Non-syn | 1  | neutral (-8)  | 10 | 10 | 10 |
| spike A6 | A23552G              | Ts | I664V | Non-syn | 4  | neutral (-60) | 2  | 0  | 3  |



|          |         |    |       |         |    |               |    |    |    |
|----------|---------|----|-------|---------|----|---------------|----|----|----|
| spike A6 | A23554G | Ts | I664M | Non-syn | 2  | neutral (-75) | 1  | 0  | 1  |
| spike A6 | T23563C | Ts | G667  | Syn     |    |               | 1  | 0  | 0  |
| spike A6 | A23566G | Ts | A668  | Syn     |    |               | 10 | 9  | 10 |
| spike A6 | T23569C | Ts | G669  | Syn     |    |               | 1  | 0  | 0  |
| spike A6 | A23572G | Ts | I670M | Non-syn | 2  | neutral (-45) | 1  | 0  | 0  |
| spike A6 | T23581C | Ts | S673  | Syn     |    |               | 1  | 0  | 1  |
| spike A6 | T23582C | Ts | Y674H | Non-syn | 0  | effect (26)   | 1  | 0  | 0  |
| spike A6 | T23584C | Ts | Y674  | Syn     |    |               | 2  | 0  | 1  |
| spike A6 | A23586G | Ts | Q675R | Non-syn | 1  | neutral (-15) | 7  | 2  | 4  |
| spike A6 | A23588G | Ts | T676A | Non-syn | 1  | neutral (-29) | 10 | 10 | 10 |
| spike A6 | T23590C | Ts | T676  | Syn     |    |               | 1  | 0  | 3  |
| spike A6 | A23592G | Ts | Q677R | Non-syn | 1  | neutral (-52) | 3  | 1  | 4  |
| spike A6 | A23594G | Ts | T678A | Non-syn | 1  | neutral (-23) | 10 | 10 | 10 |
| spike A6 | A23598G | Ts | N679S | Non-syn | 1  | neutral (-22) | 1  | 0  | 1  |
| spike A6 | T23600C | Ts | S680P | Non-syn | 1  | effect (24)   | 1  | 0  | 2  |
| spike A6 | T23602C | Ts | S680  | Syn     |    |               | 1  | 1  | 2  |
| spike A6 | T23605C | Ts | P681  | Syn     |    |               | 1  | 0  | 0  |
| spike A6 | G23607A | Ts | R682Q | Non-syn | 1  | effect (24)   | 1  | 0  | 0  |
| spike A6 | C23609T | Ts | R683W | Non-syn | 2  | effect (81)   | 1  | 0  | 0  |
| spike A6 | A23614G | Ts | A684  | Syn     |    |               | 6  | 0  | 4  |
| spike A6 | C23615T | Ts | R685C | Non-syn | -4 | effect (26)   | 1  | 0  | 0  |
| spike A6 | T23620C | Ts | S686  | Syn     |    |               | 1  | 0  | 0  |
| spike A6 | A23623G | Ts | V687  | Syn     |    |               | 6  | 2  | 2  |
| spike A6 | T23626C | Ts | A688  | Syn     |    |               | 1  | 0  | 0  |
| spike A6 | T23629C | Ts | S689  | Syn     |    |               | 1  | 0  | 0  |
| spike A6 | A23631G | Ts | Q690R | Non-syn | 1  | neutral (-19) | 1  | 0  | 0  |
| spike A6 | A23632G | Ts | Q690  | Syn     |    |               | 1  | 0  | 0  |
| spike A6 | T23633C | Ts | S691P | Non-syn | 1  | neutral (-79) | 2  | 0  | 0  |
| spike A6 | A23636G | Ts | I692V | Non-syn | 4  | neutral (-62) | 2  | 2  | 3  |
| spike A6 | A23639G | Ts | I693V | Non-syn | 4  | neutral (-86) | 1  | 0  | 0  |
| spike A6 | T23645C | Ts | Y695H | Non-syn | 0  | effect (57)   | 1  | 0  | 0  |

<sup>a</sup> Genomic region and amplicon. The genomic regions covered by each amplicon are depicted in Figure 1 of the main text.

<sup>b</sup> The SARS-CoV-2 genome residue numbering is according to the NCBI reference sequence (accession number NC\_045512.2).

<sup>c</sup> Type of mutation: transition (Ts); transversion (Tv).

<sup>d</sup> Amino acid residues (single letter code) are numbered from N- to the C- terminus of each protein.

<sup>e</sup> Type of substitution: synonymous (Syn), Non-synonymous (Non-syn).

<sup>f</sup> PAM250 (accepted point mutation 250) substitution matrix (Feng and Doolittle, Methods in Enzymology 266: 368-382, 1996). PAM250<0, lower acceptability than expected; PAM250=0, acceptability as expected; PAM250>0, acceptability higher than expected.

<sup>g</sup> SNAP2 (Screening for Non-Acceptable Polymorphism 2) prediction score values (Hecht et al, BMC Genomics 2015, 16 Suppl 8:S1). Values between -100 to 0 correspond to neutral substitution and values between 0 to 100 correspond to substitution with an effect.

<sup>h</sup> Mutations that have not been reported in database outbreak.info (enabled by GISAID) prior to March 24<sup>th</sup>, 2022.

<sup>i</sup> Divergence mutations: mutations detected at frequency of 90-100% counted relative to the Wuhan-Hu-1 NCBI reference sequence (NC\_045512.2).

<sup>j</sup> Mutation T23404C is always present in the same haplotype as the divergence mutation A23403G.

**Table S4.** Deletions found in nsp12 (polymerase)- and spike-coding regions of SARS-CoV-2 isolated from infected patients.

| Region <sup>a</sup> | Deleted nucleotides <sup>b</sup> | Affected amino acid positions <sup>c</sup> | Amino acid reference sequence <sup>c,d</sup> | Amino acid sequence detected <sup>e</sup> | Number of patients |          |        |
|---------------------|----------------------------------|--------------------------------------------|----------------------------------------------|-------------------------------------------|--------------------|----------|--------|
|                     |                                  |                                            |                                              |                                           | Mild               | Moderate | Exitus |
| nsp12 A1            | 14576 - 14627                    | 379 – 396 <sup>e</sup>                     | DP <u>A</u> MHAASGNLLLDKRTTCFSV              | DPVQ*                                     | 1                  | 0        | 0      |
| nsp12 A1            | 14851 – 14853                    | 471 <sup>e</sup>                           | LL <u>F</u> VV                               | LLVV                                      | 2                  | 2        | 0      |
| nsp12 A1            | 14851 – 14856                    | 471 – 472                                  | LL <u>F</u> VVE                              | LLVE                                      | 5                  | 4        | 4      |
| nsp12 A1            | 14852 – 14853                    | 471 <sup>e</sup>                           | LL <u>F</u> VV                               | LLCS*                                     | 0                  | 0        | 1      |
| nsp12 A1            | 14852 – 14855                    | 471 – 472                                  | LL <u>F</u> VVE                              | LL*                                       | 1                  | 0        | 0      |
| nsp12 A1            | 14853 – 14855                    | 471 – 472                                  | LL <u>F</u> VVE                              | LLLVE                                     | 0                  | 1        | 1      |
| nsp12 A1            | 14853 - 14856                    | 471 - 472                                  | LL <u>F</u> VVE                              | LLLLKLLISTLIVTMVAV<br>LMLTKSSSTT*         | 2                  | 0        | 1      |
| nsp12 A1            | 14856 – 14858                    | 472 – 473                                  | LF <u>V</u> VEV                              | LFVEV                                     | 4                  | 7        | 6      |
| nsp12 A1            | 14861 – 14866                    | 474 – 476 <sup>e</sup>                     | VVE <u>V</u> VDK                             | VVVDK                                     | 0                  | 4        | 1      |
| nsp12 A1            | 14901 – 14905                    | 487 – 489                                  | GG <u>C</u> INAN                             | GG*                                       | 1                  | 0        | 0      |
| nsp12 A1            | 14903 – 14904                    | 488 <sup>e</sup>                           | GC <u>I</u> NA                               | GCKC*                                     | 0                  | 1        | 0      |
| nsp12 A1            | 14903 – 14905                    | 488 – 489 <sup>e</sup>                     | GC <u>I</u> NAN                              | GCNAN                                     | 1                  | 4        | 3      |
| nsp12 A1            | 14903 – 14911                    | 488 – 491                                  | GC <u>I</u> NANQV                            | GCNQV                                     | 1                  | 0        | 0      |
| nsp12 A1            | 14906 – 14912                    | 489 – 491                                  | <u>C</u> INANQV                              | CITKSSSTT*                                | 1                  | 0        | 0      |
| nsp12 A2            | 15022 – 15040                    | 528 – 534                                  | AL <u>F</u> AYTKRNV                          | ALMSSLL*                                  | 2                  | 5        | 4      |
| nsp12 A2            | 15023 – 15040                    | 528 – 534                                  | AL <u>F</u> AYTKRNV                          | ALYVI                                     | 1                  | 1        | 1      |
| nsp12 A2            | 15203 – 15215                    | 588 – 592 <sup>e</sup>                     | TV <u>V</u> IGTSKF                           | TVANSMVVGTTTC*                            | 1                  | 0        | 0      |
| spike A6            | 23397 – 23398                    | 612 <sup>e</sup>                           | VLYQD                                        | VLSGC*                                    | 1                  | 0        | 0      |
| spike A6            | 23433 – 23483                    | 624 – 641 <sup>e</sup>                     | VAIHADQLTPT<br><u>W</u> RVYSTGSNVF           | VANVF                                     | 1                  | 0        | 0      |
| spike A6            | 23450 – 23456                    | 630 – 632                                  | QLTPTWR                                      | QLLGVFILQVLMFFKHV<br>QAV*                 | 0                  | 1        | 1      |
| spike A6            | 23450 – 23459                    | 630 – 633 <sup>e</sup>                     | QLTPTWRV                                     | QLGVFILQVLMFFKHVQ<br>AV*                  | 0                  | 1        | 1      |
| spike A6            | 23541 – 23584                    | 660 – 674 <sup>e</sup>                     | NSYEC <u>D</u> IPIGAGICASYQT                 | NSSDSD*                                   | 0                  | 0        | 1      |
| spike A6            | 23542 – 23582                    | 660 – 674 <sup>e</sup>                     | NSYEC <u>D</u> IPIGAGICASYQT                 | NS*                                       | 0                  | 5        | 3      |
| spike A6            | 23543 – 23584                    | 661 – 674                                  | SYEC <u>D</u> IPIGAGICASYQT                  | NSYQT                                     | 0                  | 0        | 1      |
| spike A6            | 23551 – 23583                    | 663 – 674 <sup>e</sup>                     | EC <u>D</u> IPIGAGICASYQT                    | ECDQT                                     | 0                  | 3        | 4      |

|          |               |                        |                         |                          |   |    |    |
|----------|---------------|------------------------|-------------------------|--------------------------|---|----|----|
| spike A6 | 23555 – 23570 | 665 – 670 <sup>c</sup> | DI <u>PI</u> GAGICA     | DIYALVIRLRLILLGGHV<br>V* | 1 | 3  | 3  |
| spike A6 | 23555 – 23582 | 665 – 674              | DI <u>PI</u> GAGICASYQT | DIIRLRLILLGGHV*          | 9 | 10 | 10 |
| spike A6 | 23561 – 23570 | 667 – 670              | PI <u>G</u> AGICA       | PIYALVIRLRLILLGGHV<br>V* | 0 | 1  | 1  |
| spike A6 | 23561 – 23582 | 667 – 674              | PI <u>G</u> AGICASYQT   | PIIRLRLILLGGHV*          | 5 | 10 | 9  |
| spike A6 | 23562 – 23580 | 667 – 673              | PI <u>G</u> AGICASYQ    | PIVIRLRLILLGGHV*         | 0 | 0  | 1  |
| spike A6 | 23571 – 23582 | 670 – 674 <sup>c</sup> | AG <u>I</u> CASYQT      | AGNQT                    | 0 | 7  | 3  |
| spike A6 | 23572 – 23573 | 670 – 671 <sup>c</sup> | AG <u>I</u> CAS         | AGMR*                    | 0 | 1  | 2  |
| spike A6 | 23572 – 23584 | 670 – 674 <sup>c</sup> | AG <u>I</u> CASYQT      | AGIRLRLILLGGHV*          | 1 | 0  | 1  |

<sup>a</sup> Genomic region and amplicon. The genomic regions covered by each amplicon are depicted in Figure 1 of the main text.

<sup>b</sup> The SARS-CoV-2 genome residue numbering is according to the NCBI reference sequence (accession number NC 045512.2).

<sup>c</sup> Amino acid residues are numbered from N- to the C-terminus of each protein.

<sup>d</sup> Amino acids affected by the deletion are the ones underlined.

<sup>e</sup> Amino acid sequence detected in virus from infected patients. The asterisks indicate a stop codon. Absence of asterisk means that the open reading frame is maintained.

<sup>f</sup> Deletions that have not been reported in database outbreak.info (enabled by GISAID) prior to March 24th, 2022.

**Table S5.** Statistical analysis of the acceptability of the repertoire of amino acid substitutions identified in nsp12 (polymerase) and spike.

| <b>SNAP2 &gt; 0</b>             | <b>Cut-off 0.5%</b> | <b>Cut-off 0.1%</b> | <b>p-value</b> | <b>Significance<sup>a</sup></b> |
|---------------------------------|---------------------|---------------------|----------------|---------------------------------|
| <b>nsp12</b>                    | 19                  | 170                 | <b>0.863</b>   | <b>n.s.</b>                     |
| <b>spike</b>                    | 5                   | 56                  | <b>1</b>       | <b>n.s.</b>                     |
| <b>p-value</b>                  | <b>0.369</b>        | <b>&lt; 0.001</b>   |                |                                 |
| <b>Significance<sup>a</sup></b> | <b>n.s.</b>         | <b>***</b>          |                |                                 |
| <b>PAM250 &lt; 0</b>            | <b>Cut-off 0.5%</b> | <b>Cut-off 0.1%</b> | <b>p-value</b> | <b>Significance<sup>a</sup></b> |
| <b>nsp12</b>                    | 6                   | 72                  | <b>0.468</b>   | <b>n.s.</b>                     |
| <b>spike</b>                    | 3                   | 26                  | <b>1</b>       | <b>n.s.</b>                     |
| <b>p-value</b>                  | <b>1</b>            | <b>0.142</b>        |                |                                 |
| <b>Significance<sup>a</sup></b> | <b>n.s.</b>         | <b>n.s.</b>         |                |                                 |

<sup>a</sup> Statistical significance of the differences is given (n.s. not significant; \*\*\* p < 0.001).

Figure S1

A

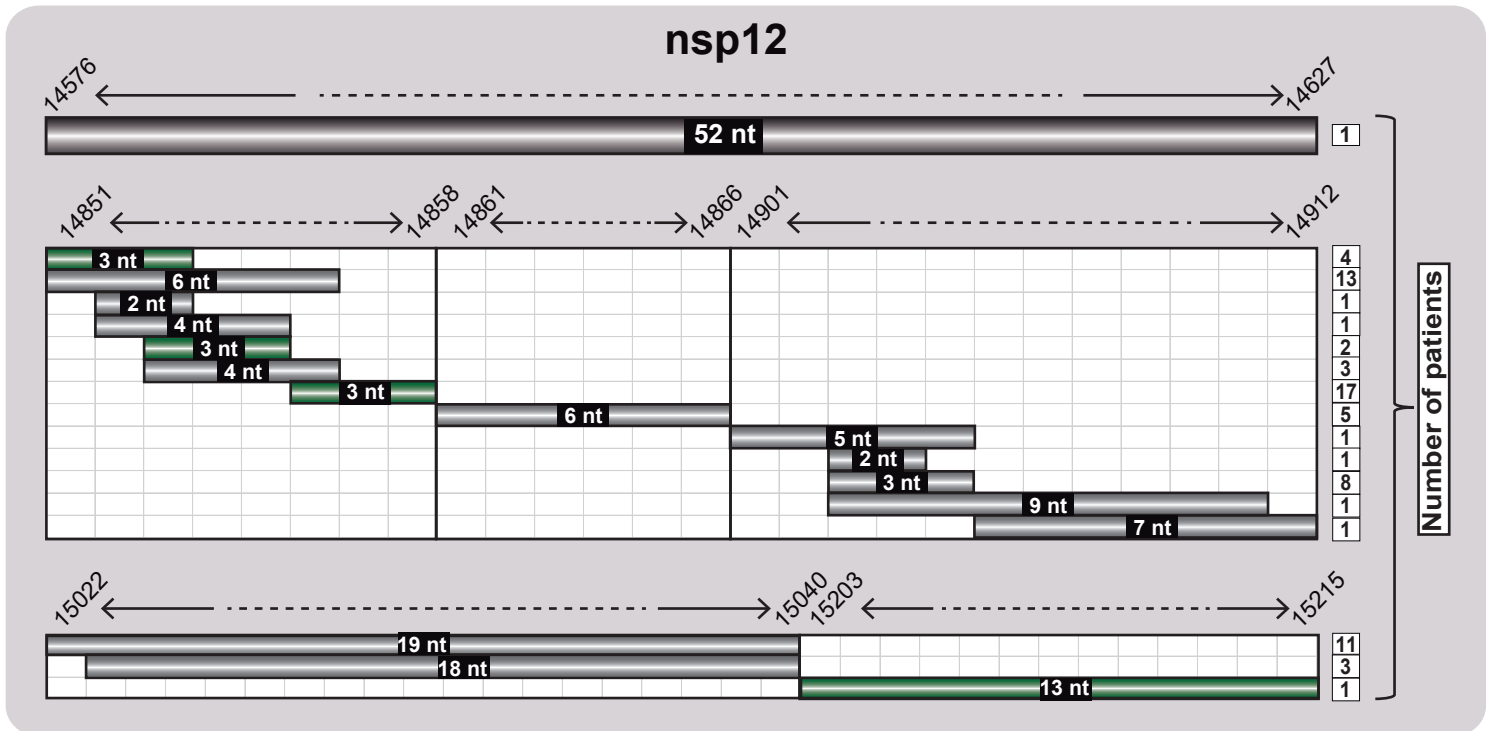

B

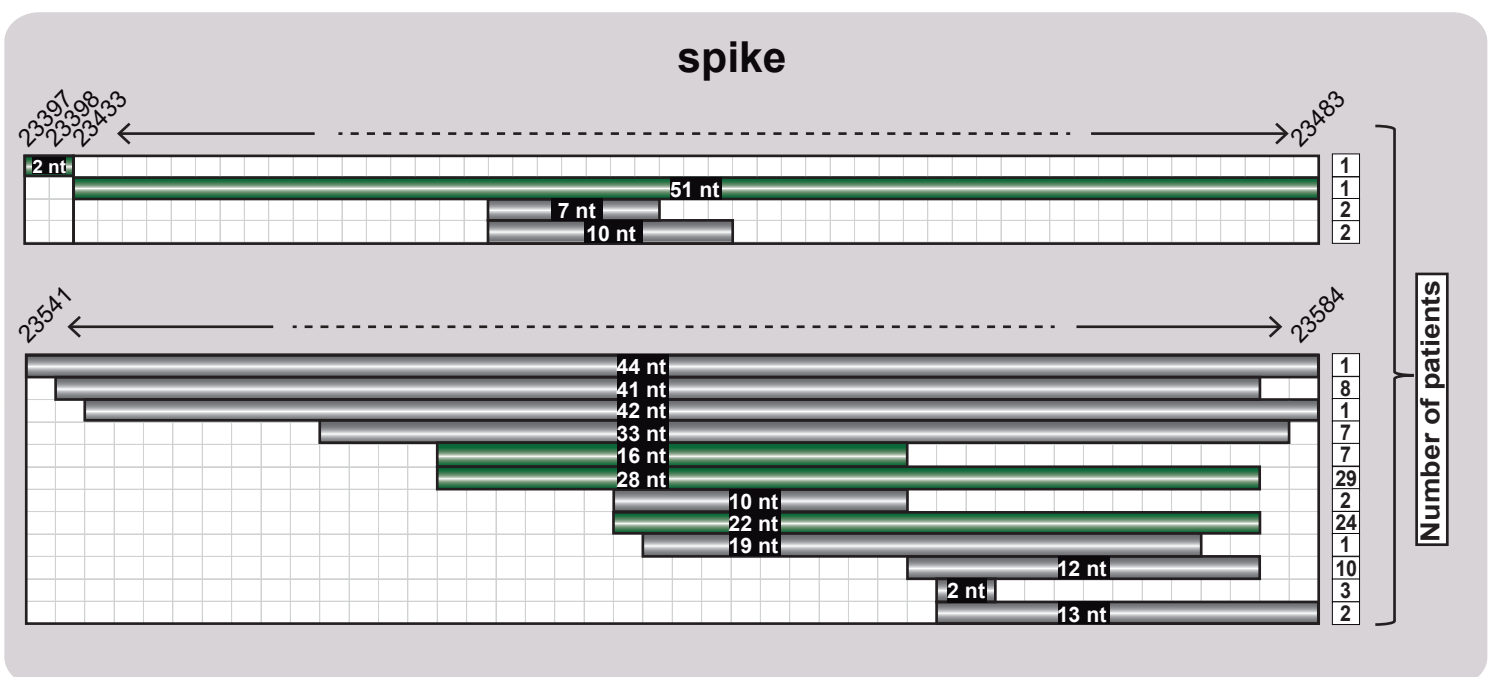

**Figure S1.** Deletion types in the nsp12 (polymerase)-(A) and the spike-(B) coding regions. Each deletion is indicated by a grey bar (deletions found only at 0.1% cut-off) or green (deletions found at 0.1% and 0.5% cut-off), with the number of deleted nucleotides indicated inside the black boxes. On the top, the numbering of the nucleotides covering each region is given (genome numbering is according to the reference genome NCBI accession number: NC\_045512.2). The white boxes at the right indicate the total number of patients whose virus carries each deletion.

A

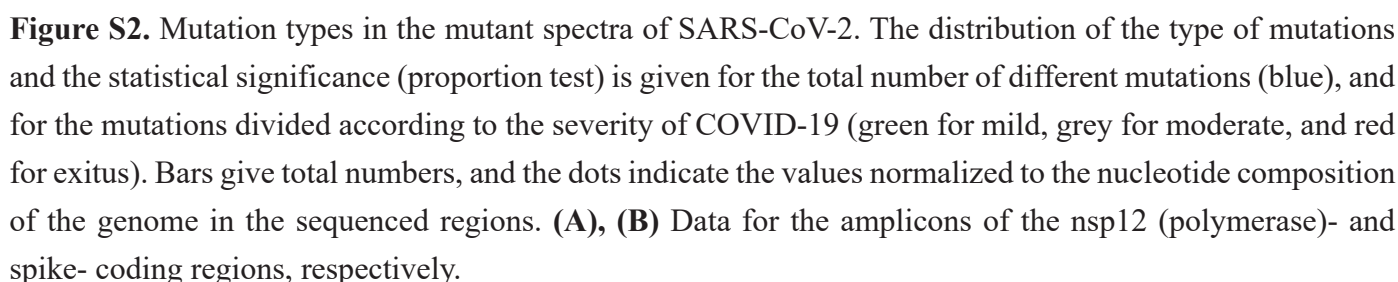

**Figure S3**

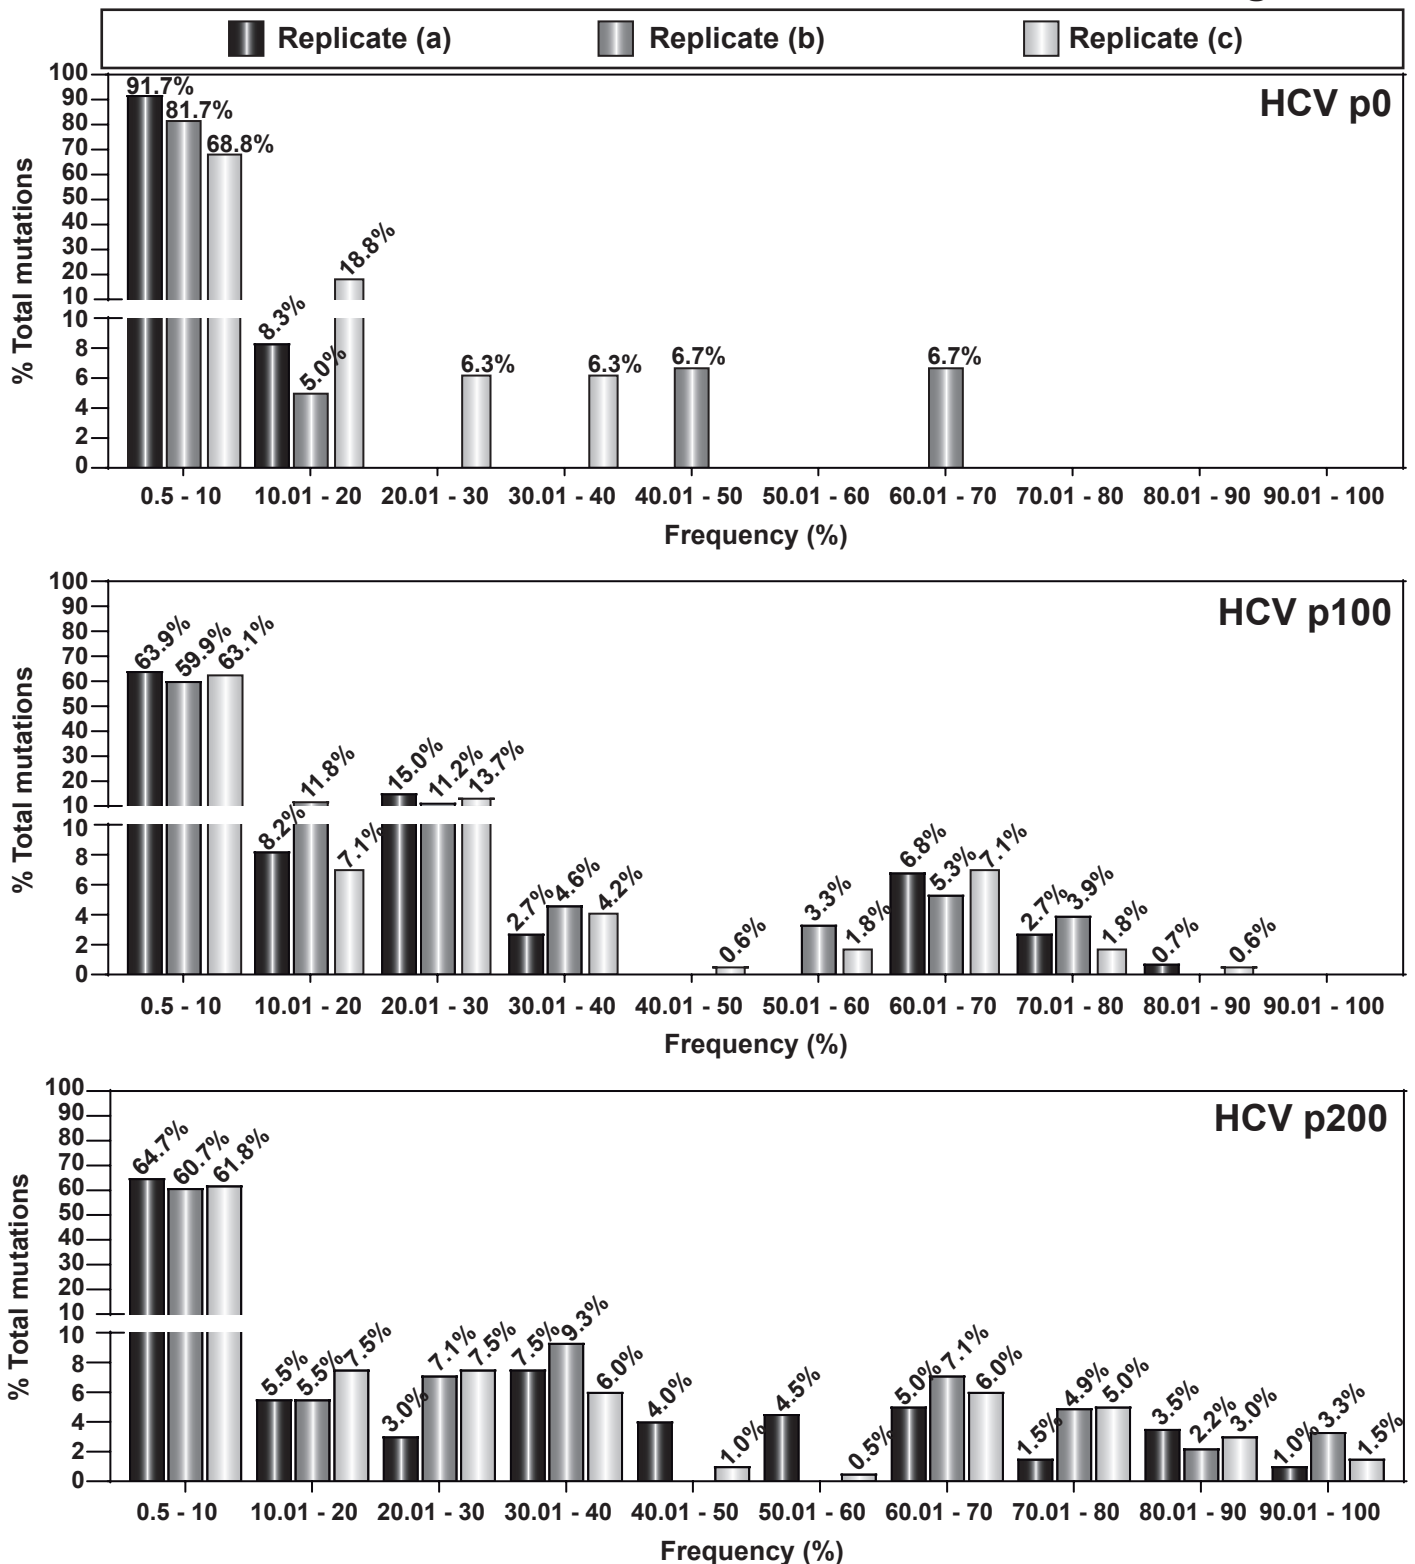

**Figure S3.** Percentage of total mutations observed in HCV laboratory populations (HCV p0, HCV p100, and HCV p200) distributed according to their frequency with a 0.5% as the low frequency limit. Region analyzed corresponds to genomic residues 7,649 (NS5A-coding region) to 8,653 (NS5B-coding region) (genome numbering according to reference isolate JFH-1, accession number AB047639). Color code of each replicate [(a), (b) and (c)] is indicated on the top box. Data origin and experimental procedures are described in Materials and Methods.
